# Supplementary material
Source: PubMed Central journal article supplement (PMC7758824)
Supplement: jamasurg-e205601-s001.pdf [file jamasurg-e205601-s001.pdf]

## Supplementary Online Content

Jones GD, Brandt WS, Shen R, et al. A genomic-pathologic annotated risk model to predict recurrence in early-stage lung adenocarcinoma. *JAMA Surg*. Published online December 23, 2020. doi:10.1001/jamasurg.2020.5601

**eMethods.** Sequencing and Analysis

**eFigure 1.** CONSORT Diagram for the Stage I-III Cohort

**eFigure 2.** Distribution of Demographic, Clinicopathologic, and Genomic Characteristics in Early- and Late-Stage Lung Adenocarcinoma (LUAD)

**eFigure 3.** Fraction and Distribution of Mutations Associated With a Smoking Signature

**eFigure 4.** Genomic Patterns of Recurrence

**eFigure 5.** Association Between Tumor Mutation Burden (TMB) and Aggressive Clinicopathologic Features

**eFigure 6.** Association Between Fraction of Genome Altered (FGA) and Aggressive Clinicopathologic Features

**eFigure 7.** Association Between Fraction of Genome Altered and Tumor Mutation Burden

**eFigure 8.** Histogram of the Relapse-Free Survival (RFS) Risk Score Computed Using PRecur, Integrating Clinical and Next-Generation Sequencing Data

**eFigure 9.** PRecur Prediction Model for Relapse-Free Survival (RFS) Using Integrated Clinicopathologic and Genomic Variables for Risk Stratification

**eFigure 10.** PRecur Prediction Model Including Only Patients in the MSK Cohort Whose Primary Tumor Did Not Harbor a Level 1 Actionable Mutation (n = 309)

**eFigure 11.** PRecur-ExVal Prediction Model for the MSK Cohort (n = 426)

**eFigure 12.** Histogram of the Relapse-Free Survival (RFS) Risk Score Computed Using PRecur-ExVal for the TCGA Data Set (n = 360)

**eTable 1.** Summary of Patterns of Recurrence (n = 75)

**eTable 2.** Genes in the 468-Gene MSK-IMPACT Panel

**eTable 3.** Univariable and Multivariable Cox Proportional Hazards Models for Relapse-Free Survival, Using Clinicopathologic Variables

**eTable 4.** Univariable and Clinicopathologic (CP)-Adjusted Multivariable Cox Model for Relapse-Free Survival

**eTable 5.** Types of Alteration and Recurrence Rates for Patients With Alterations in Genes Associated With Relapse-Free Survival

**eTable 6.** Number of Level 1 Actionable Alterations

**eTable 7.** Comparison of Proportion of Patients With Pathologic Stage I Cancer Who Recurred by TNM Risk Group

**eTable 8.** Predicted Relapse-Free Survival at 1, 2, and 3 Years by PRecur Risk Group for the MSK and TCGA Data Sets

**eReferences.**

This supplementary material has been provided by the authors to give readers additional information about their work.

## eMethods. Sequencing and Analysis

### *MSK-IMPACT Sequencing*

Patient tumors and matched normal blood specimens were analyzed in a CLIA-certified laboratory using the MSK-IMPACT assay, a capture-based next-generation sequencing (NGS) platform that detects mutations, copy-number alterations, and select rearrangements in up to 468 cancer-associated genes, as previously described.<sup>1,2</sup> The minimum and mean depth of coverage per sample in our study were 164x and 784x, respectively.

### *Gene Grouping for Biological Relevance*

Grouping of genes was based on related biological function.<sup>3</sup> *CDK4*, *CDKN2A*, and *RBI* were grouped, as they are members of the cell cycle pathway. *PIK3CA*, *PIK3R1*, *PTEN*, and *TSC* are members of the PI3K pathway. *BRAF*, *RAF1*, *RIT1*, and *MAP2K1* are members of the RTK/RAS pathway, while *NF1* and *RASA1* are known negative regulators of this pathway. *ERBB2* and *MET* are receptor tyrosine kinases implicated in lung adenocarcinoma. *RET*, *ROS1*, and *ALK* are the most well-known and actionable fusions in lung adenocarcinoma.<sup>3,4</sup>

### *Mutational Signatures Associated with Smoking*

In order to investigate mutational signatures associated with tobacco smoking, we used version 3 from the catalogue provided by COSMIC (<https://cancer.sanger.ac.uk/cosmic/signatures/>). Signatures were computed as described in doi: <https://doi.org/10.1101/322859>, and we focused on signature SBS4, which is known to have been observed in experimental systems exposed to tobacco carcinogens (<https://cancer.sanger.ac.uk/cosmic/signatures/SBS/SBS4.tt>).

### *Statistical Analysis*

The primary outcome of interest was relapse-free survival (RFS), defined as the duration between surgery and recurrence or death without recurrence. Otherwise, patients were censored at the time of last follow-up. RFS was estimated using the Kaplan-Meier approach and compared between clinicopathologic factors and genetic alterations of interest using the log-rank test, stratified by pathologic stage where appropriate. Analyses considering only genomic alterations were adjusted for multiple testing using the false discovery rate (FDR) approach. Selection as candidates for the multivariable models were conducted using the FDR-adjusted p values, where applicable. All analyses were 2-sided, and  $p < 0.05$  was considered statistically significant. The proportional hazards assumption was assessed using statistical tests and graphical diagnostics based on the scaled Schoenfeld residuals. There was no indication of violation of the proportional hazards assumption: the tests for each of the covariates were not significant, the global test was not statistically significant, and the graphical diagnostics did not indicate pattern with time for each covariate. Statistical analyses were conducted using Stata 13.1 (Stata Corp, College Station, Texas) and R 3.5.1 (R Development Core Team, Austria, Vienna), including the “survival,” “rms,” “riskRegression,” and “mice” packages, downloaded in November 2018. Median follow-up duration was generated using the reverse Kaplan-Meier method.<sup>5</sup>

### *Development of the Association Models to Identify Factors Associated with RFS*

In the first stage of the analysis, our goal was to identify factors associated with the primary outcome of RFS. We focused on developing a clinical-only model including relevant clinicopathologic factors. Associations between clinical factors and RFS were assessed using univariable Cox proportional hazards models, stratified by pathologic stage (except in the case of stage factor itself and pathologic tumor size) (clinicopathologic [CP]-association model). Multicollinearity was examined between lymphovascular invasion (LVI) and visceral pleural invasion (VPI). Predominant histologic subtypes were classified into one of five groups (lepidic [n=71], acinar [n=220], papillary [n=29], micropapillary [n=23], or solid [n=52]), or “other [n=26]” (which was comprised of adenocarcinoma in-situ [AIS] and minimally-invasive adenocarcinoma [MIA]). A multivariable model was constructed starting with all factors with  $p < 0.1$  from the univariable analyses. The relationship between each genomic factor or gene and the primary outcome was assessed using univariable Cox models, with adjustment for normalized tumor mutation burden (TMB). Analyses considering only genomic alterations were adjusted for multiple testing using the FDR approach. TMB was used as a continuous variable for all analyses. Nonlinearity of TMB was assessed with restricted cubic splines with 3 knots. Genomic factors significant on univariable analysis were then assessed in the presence of the significant factors from the CP-association model, in order to generate an adjusted hazard ratio for each factor (combined association model).

### *Imputation of Missing Data in the MSK Cohort*

To handle missing data, multiple imputation by chained equation was conducted using the *mice* package in R 3.5.1 (R Core Team, Vienna, Austria) to derive 10 imputed data sets with a maximum of 50 iterations each.<sup>6</sup> This method is based on fully conditional specification, in which each incomplete variable is imputed by a separate model. All

variables considered in subsequent analyses were included in the imputation models, including survival outcomes.<sup>7</sup> The imputation method for primary tumor maximum standardized uptake value (14% missing) and fraction of genome altered (2% missing) were based on predictive mean modeling to ensure that imputed values were plausible. The method was (Bayesian) logistic regression for LVI (1% missing) and spread through air spaces (1% missing). The analysis model was fit on each imputed data set for the outcome of interest, and estimates from each of the 10 imputed data sets were pooled into a single set of estimates and standard errors using Rubin's rules.<sup>8</sup>

#### *Integrated Risk Stratification for RFS Using PRecur*

PRecur uses a statistical machine-learning approach previously described by our group to integrate genomic and clinicopathologic variables by building a collection of gradient boosting survival tree models for RFS.<sup>9</sup> A total of 13 clinicopathologic (see eTable 2) and 50 genomic variables (see eTable 3) were included in training the PRecur model using a boosted survival random forest method. Gradient boosting (GBM) is a machine-learning technique for regression that iteratively generates prediction models (i.e., decision trees) using a set of tuned optimal parameters. An ensemble of 1,000 survival regression trees was generated in each 5-fold cross-validation for predicting the risk of RFS using consensus prediction. The average tree-depth—or number of variables in a tree—was 2 (range 1-4), with each tree including a varying combination of clinicopathologic and genomic variables. A clinicopathologic or genomic variable's relative importance represents the contribution of that variable to the PRecur predictive model. Differences in pathologic stage between patients were accounted for by including the pathologic stage variable in the development of the model. A predicted risk score was assigned to each patient in the test set at each iteration. The predicted risk score of each patient was then averaged and rescaled between 0 and 10 (with increasing values indicating higher risk of recurrence). An optimization procedure for defining low-, intermediate-, and high-risk groups was then conducted using the maximally selected rank statistic approach to search for cutoffs that maximize the survival differences across the risk groups.<sup>10</sup> The *p* value for the resulting Kaplan-Meier curves was adjusted for inflation due to the cutoff optimization. Finally, at each iteration, the predictive performance of the model was recorded by assessing its concordance probability estimate (CPE) on the testing set. Of the total 426 patients, all had complete genomic data and 335 had all clinicopathologic variables required for generation of the prediction model.

#### *Performance Measures of the Predictive Model*

To assess the strength of a predictive model or risk-stratification system, a measure of discrimination must be used.<sup>11</sup> When survival is the outcome of interest, the most commonly applied global measure of discrimination is the concordance probability.<sup>12</sup> The concordance probability represents the pairwise probability of higher predicted risk equating to shorter observed survival. The concordance index (c-index)<sup>13</sup> and the concordance probability estimate (CPE)<sup>12,14,15</sup> are commonly used to estimate the concordance probability when predicted risk scores are continuous. Values closer to 1 represent better discriminatory ability. The c-index relies on the imputation of failure times, which leads to estimation bias in heavily censored cohorts such as ours. In contrast, CPE relies only on the regression parameters, and not on the observed failure and censoring times, avoiding estimation bias. As such, the CPE was chosen to assess the discrimination performance of our PRecur predictive model. For internal validation of the predictive model, CPE was derived on the basis of 200 cross-validation resamples.

#### *External Validation of Risk Prediction Model*

For external validation of our predictive model, we initially examined surgically resected lung adenocarcinoma data sets from The Cancer Genome Atlas (TCGA),<sup>16</sup> the Broad Institute<sup>17</sup> and TRACERx.<sup>18</sup> Unfortunately, in the Broad and TRACERx data sets the small numbers of patients with all data elements ( $n < 140$  in both sets) and recurrence events ( $n < 12$  in both sets), as well as differences in the distribution of tumor staging, lack of follow-up and detailed clinicopathologic variables precluded external validation studies. We therefore chose the TCGA data set ( $N = 360$ ), adjusted to 8<sup>th</sup> edition staging classification, for external validation. We generated an external validation model for our MSK-IMPACT early-stage cohort data set by including only the overlapping clinical covariates between ours and the TCGA data sets (age, sex, smoking status, and pathologic stage), all genes with frequency of alteration  $> 1\%$  ( $N = 47$ , eTable 2), as well as TMB, fraction of genome altered, and whole-genome doubling. PRecur analysis was then performed identical to the complete model discussed above, with 200 cross-validations. An average predicted risk score was then assigned to each patient in the TCGA data set ( $N = 360$ ). Risk scores were further stratified into three groups based on the bounds of the tertiles in our ensemble training model (cuts made at tertiles correspond to risk scores of 2.5 and 5.1). Kaplan-Meier analysis was then performed to determine the difference in RFS between the 3 risk groups and compared via the log-rank test.

An interactive web application of our PRecur prediction model is available at the following link, so that users may be able to input clinicopathologic and genomic variables from other data sets:

<https://axelitomartin.shinyapps.io/OncoCast-NSCLC/>. The application will return a risk score for each patient calculated from the boosted survival random forest model that was trained on our dataset. All factors listed in the table below must have a designation in order for the app to run correctly. As this is a first-generation app, subsequent versions/revisions will be available at the same URL. For the convenience of the reader, for data sets that do not contain all of these factors, the model may be retrained with a unique list of factors in this external data set using the algorithm at the following link: <https://github.com/AxelitoMartin/OncoCast>.

| Genomic Factors | Genes   | Clinical Factors | Pathologic Factors |
|-----------------|---------|------------------|--------------------|
| TMB             | ALK     | Age              | Tumor_SUVmax       |
| WGD             | APC     | Sex              | Procedure          |
| FGA             | ARID1A  | Smoker           | Stage              |
|                 | ARID2   |                  | Adjuvant           |
|                 | ATM     |                  | LVI                |
|                 | B2M     |                  | VPI                |
|                 | BAP1    |                  | Lepidic            |
|                 | BCOR    |                  | Acinar             |
|                 | BRAF    |                  | Papillary          |
|                 | BRCA2   |                  | Micropapillary     |
|                 | CDK4    |                  | Solid              |
|                 | CDKN2A  |                  |                    |
|                 | CDKN2B  |                  |                    |
|                 | CTNNB1  |                  |                    |
|                 | EGFR    |                  |                    |
|                 | ERBB2   |                  |                    |
|                 | FAT1    |                  |                    |
|                 | FOXA1   |                  |                    |
|                 | GLI1    |                  |                    |
|                 | GNAS    |                  |                    |
|                 | KEAP1   |                  |                    |
|                 | KIT     |                  |                    |
|                 | KRAS    |                  |                    |
|                 | MDM2    |                  |                    |
|                 | MED12   |                  |                    |
|                 | MET     |                  |                    |
|                 | MGA     |                  |                    |
|                 | MYC     |                  |                    |
|                 | NF1     |                  |                    |
|                 | NF2     |                  |                    |
|                 | NKX2.1  |                  |                    |
|                 | NTRK1   |                  |                    |
|                 | PIK3CA  |                  |                    |
|                 | PIK3R1  |                  |                    |
|                 | PTPRD   |                  |                    |
|                 | PTPRT   |                  |                    |
|                 | RB1     |                  |                    |
|                 | RBM10   |                  |                    |
|                 | RET     |                  |                    |
|                 | ROS1    |                  |                    |
|                 | SETD2   |                  |                    |
|                 | SMAD4   |                  |                    |
|                 | SMARCA4 |                  |                    |
|                 | STK11   |                  |                    |
|                 | TERT    |                  |                    |
|                 | TP53    |                  |                    |
|                 | U2AF1   |                  |                    |

**eFigure 1. CONSORT Diagram for the Stage I-III Cohort**

**Surgical Resection for Lung Adenocarcinoma  
with NGS on 1° Tumor (N=633)**

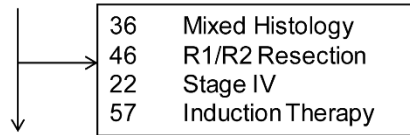

**R0 Resection for Stage I-III Lung Adenocarcinoma (N=472)**

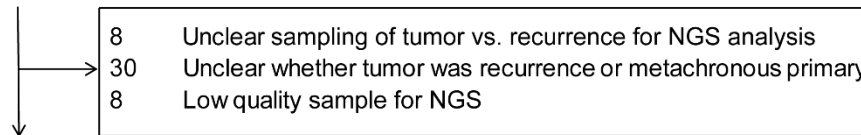

**R0 Resection, Stage I-III Lung Adenocarcinoma  
with NGS on 1° Tumor (N=426)**

**eFigure 2. Distribution of Demographic, Clinicopathologic, and Genomic Characteristics in Early- and Late-Stage Lung Adenocarcinoma (LUAD)**

**(A) Demographic and clinicopathologic comparison of stage I-III (N=426) and stage IV (N=338) LUAD cohorts. (B) Percent alteration of genes present in next-generation sequencing (NGS) and grouped by biological relevance in stage I-III vs. IV LUAD.**

\*FDR- $p < 0.05$  for difference in alteration frequency between cohorts. Data from the stage IV cohort include NGS from primary (1°) lung tumors only—not metastatic sites.

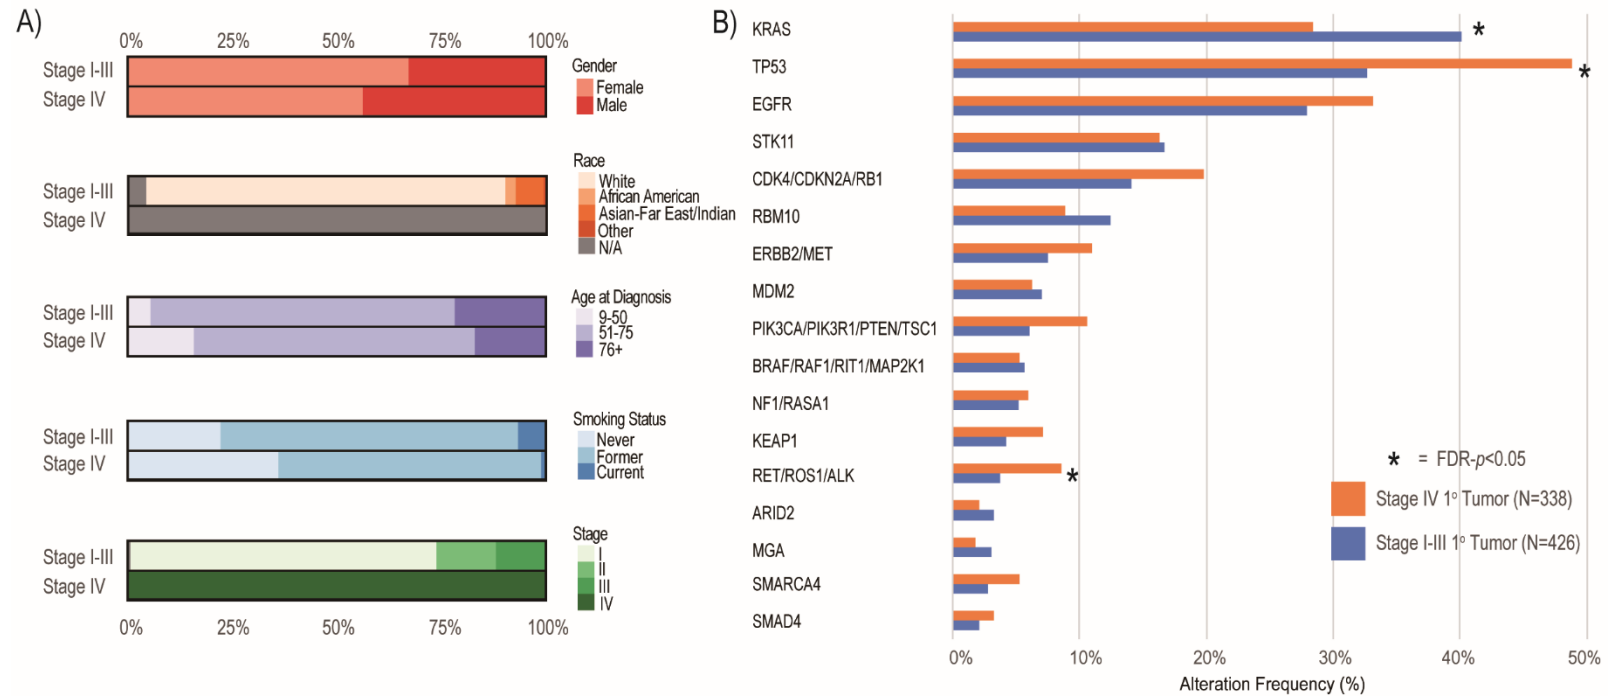

### eFigure 3. Fraction and Distribution of Mutations Associated With a Smoking Signature

#### A, Fraction of mutations associated with a smoking signature for current, former, and never smokers

Reported p-value based on Kruskal-Wallis test. (B) Distribution of smoking signature mutational fractions (a cutoff of 0.10 was used for fraction of mutations associated with a smoking signature).

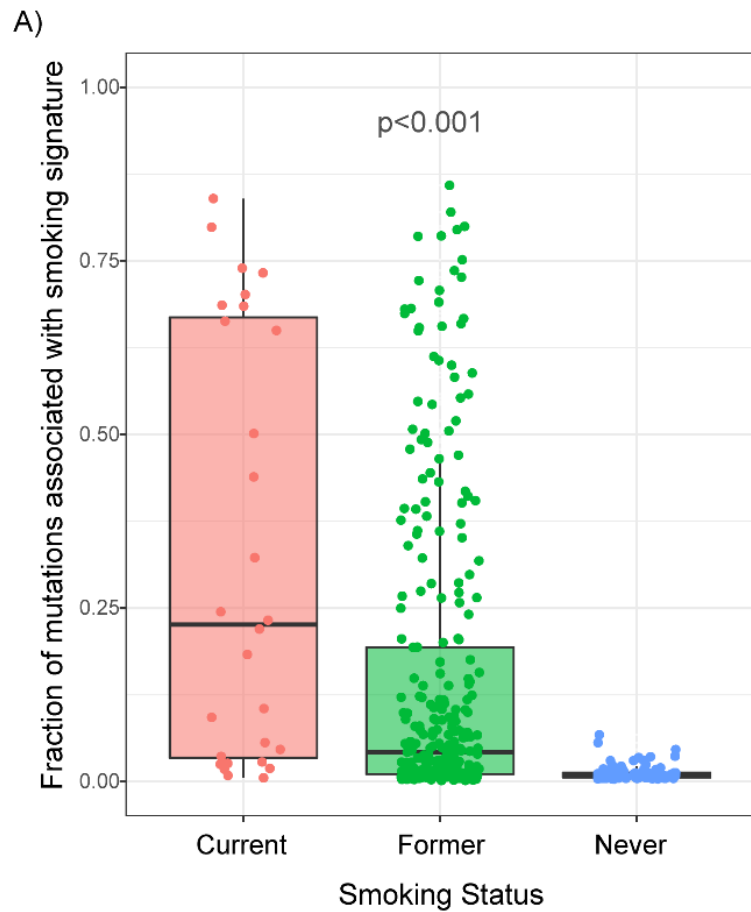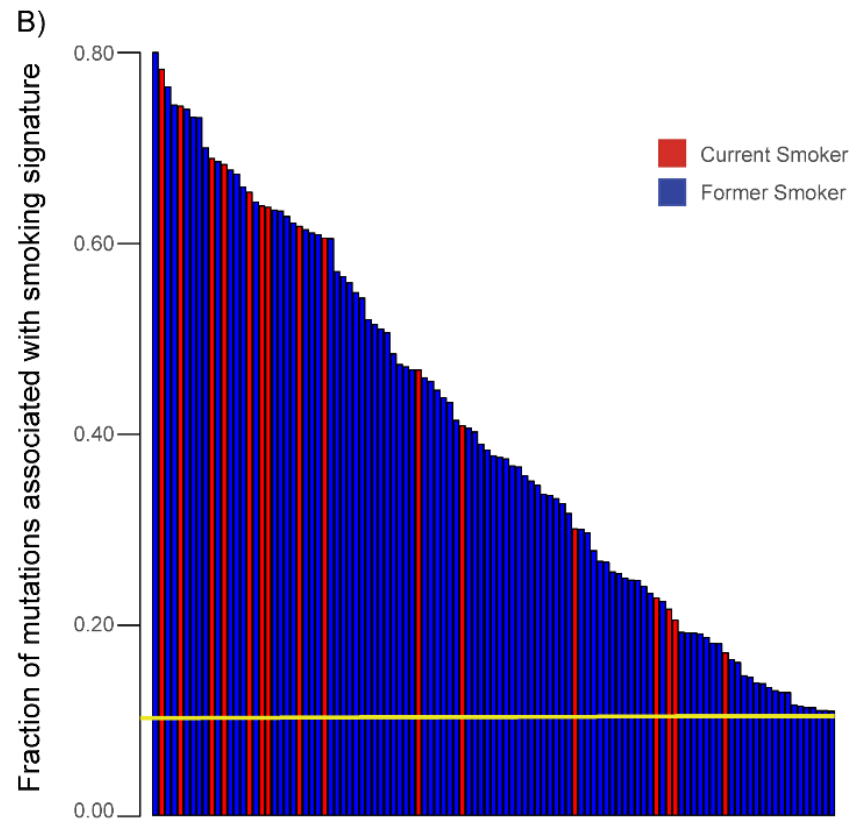



### eFigure 4. Genomic Patterns of Recurrence

The relative genomic alteration profiles of primary tumors are shown in the Oncoprint for patients with (n=75) and without (n=351) recurrence, with selected clinicopathologic variables. Genes included were the level I actionable oncogenes for lung adenocarcinoma (*EGFR*, *BRAF*, *ALK*, and *ROS1*), those associated with worse relapse-free survival (*SMARCA4* and *TP53*), and *KRAS*. \*FDR-p<0.05 for difference in alteration frequency between groups. FGA, fraction of genome altered; LVI, lymphovascular invasion; STAS, spread through air spaces; TMB, tumor mutation burden.

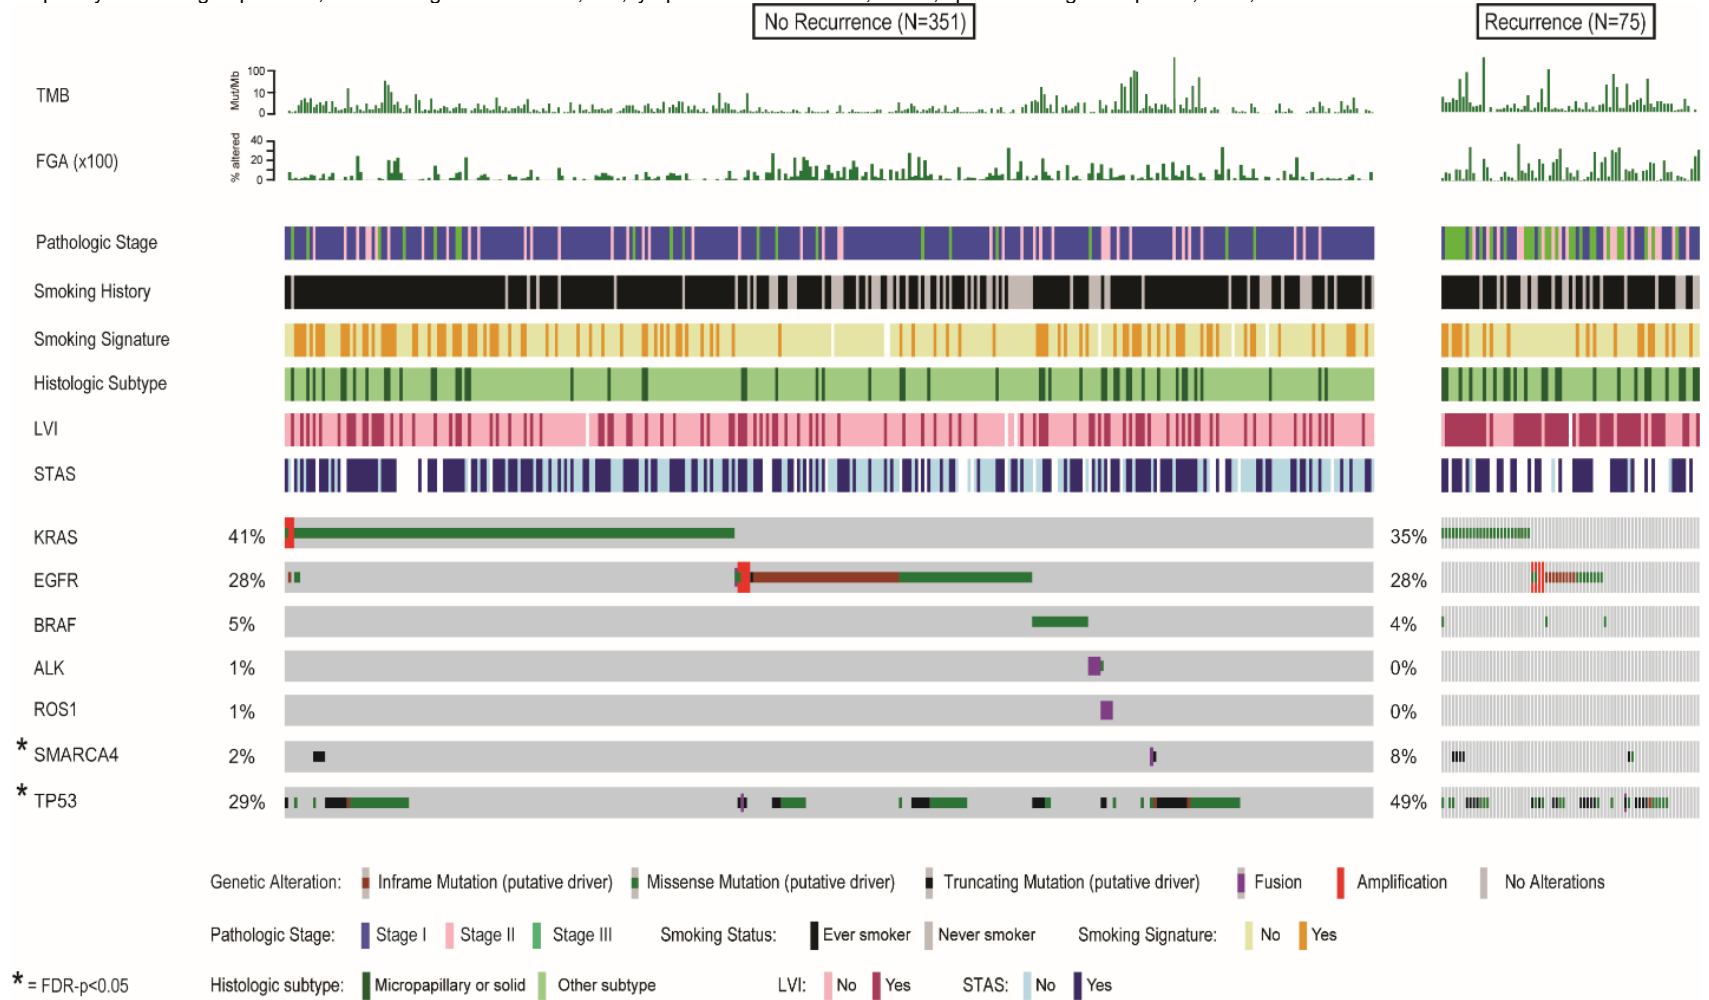

## eFigure 5. Association Between Tumor Mutation Burden (TMB) and Aggressive Clinicopathologic Features

Association between tumor mutation burden (TMB) and aggressive clinicopathologic features; TMB and (A) smoking status, (B) predominant histologic subtype, (C) lymphovascular invasion, (D) spread of tumor through air spaces (STAS), (E) lymph node positivity, (F) tumor maximum standardized uptake value (SUVmax; median, 3.6), (G) pathologic stage, and (H) pathologic tumor size. The median TMB and interquartile range (IQR) are reported for each variable. Aci, acinar; lep, lepidic; mipap, micropapillary; pap, papillary; sol, solid.

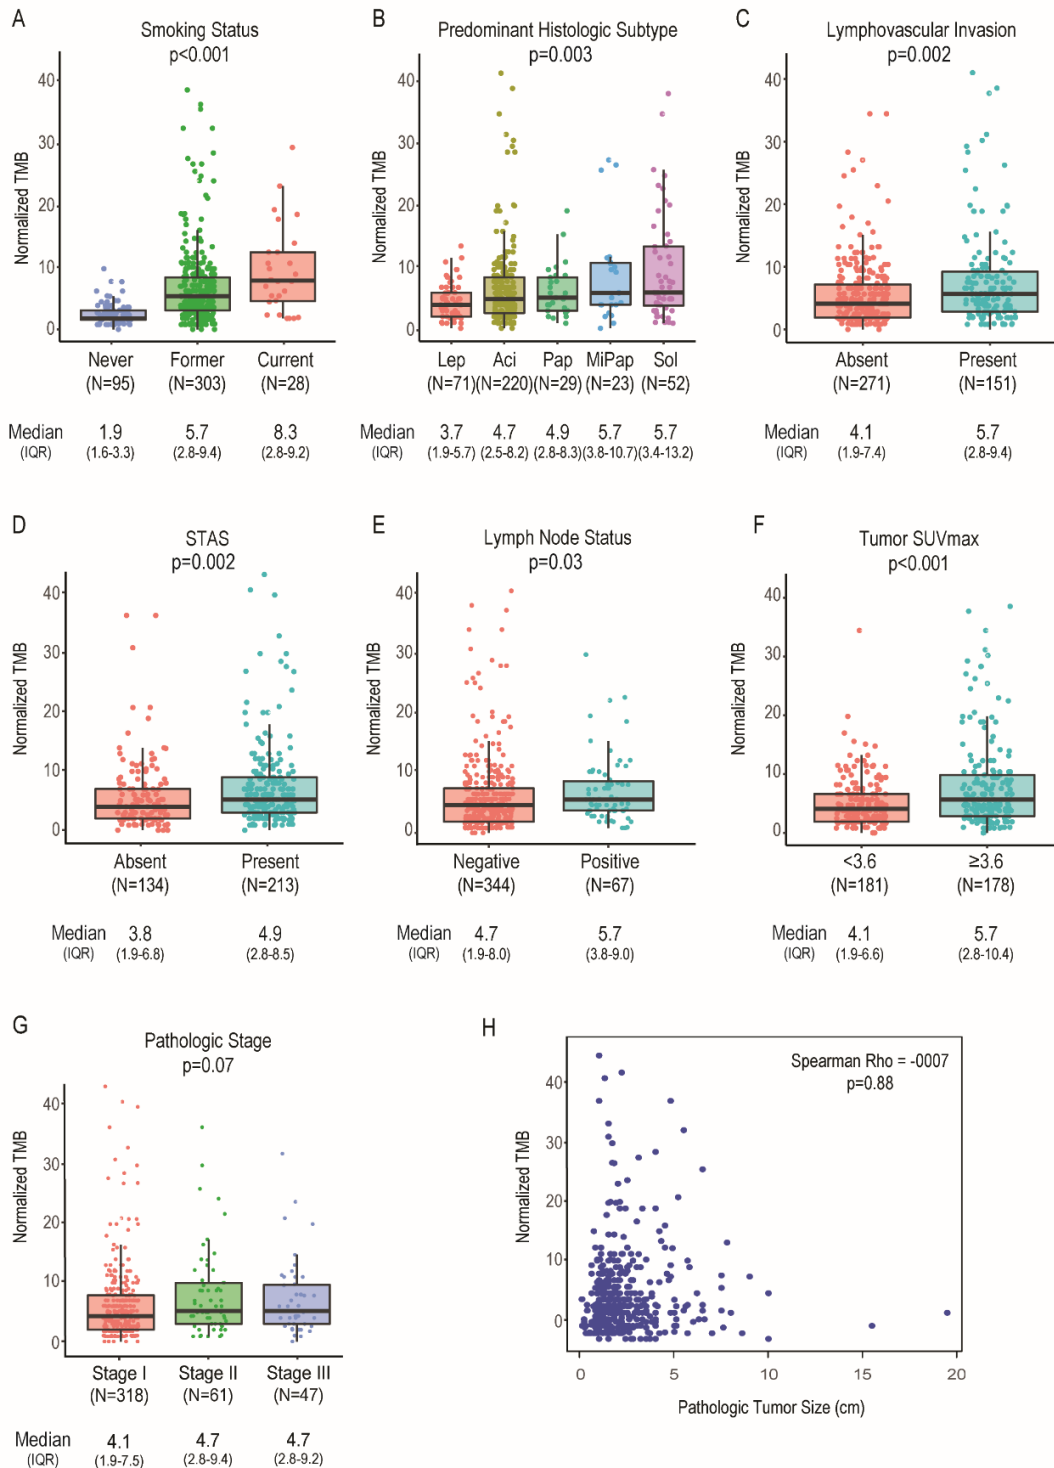

**eFigure 6. Association Between Fraction of Genome Altered (FGA) and Aggressive Clinicopathologic Features**

FGA and (A) smoking status, (B) predominant histologic subtype, (C) lymphovascular invasion, (D) spread of tumor through air spaces (STAS), (E) lymph node positivity, (F) tumor maximum standardized uptake value (SUVmax; median, 3.6), (G) pathologic stage, and (H) pathologic tumor size. The median FGA and interquartile range (IQR) are reported for each variable. Aci, acinar; lep, lepidic; mipap, micropapillary; pap, papillary; sol, solid.

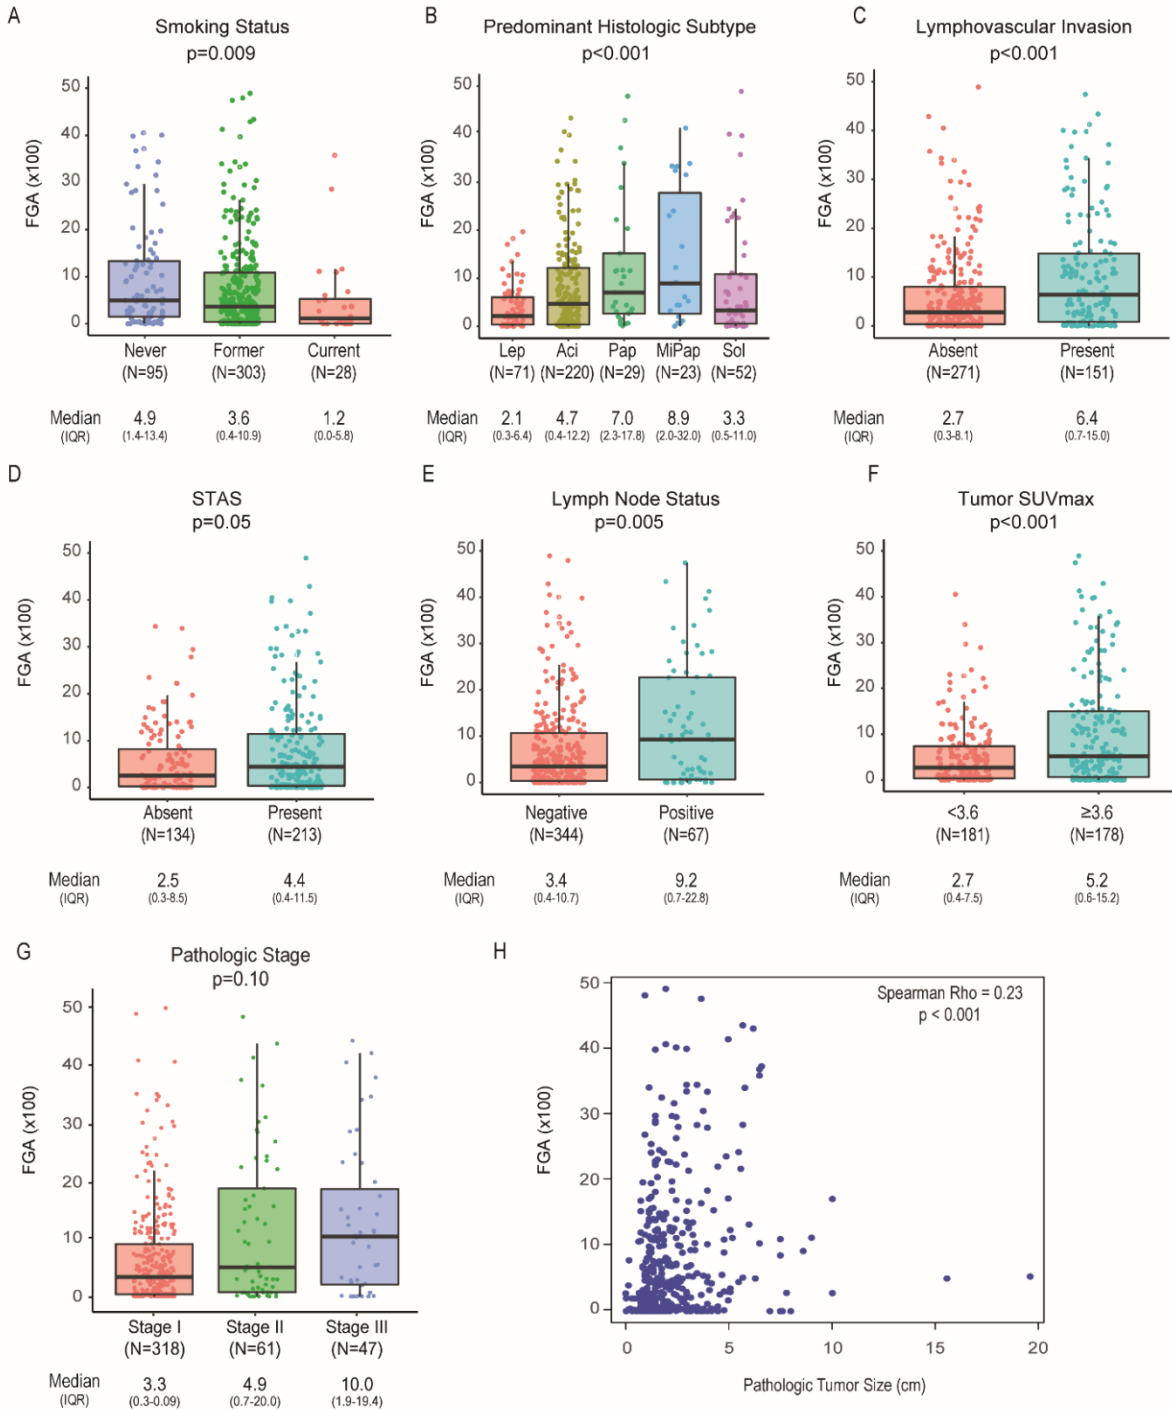

**eFigure 7. Association Between Fraction of Genome Altered and Tumor Mutation Burden**

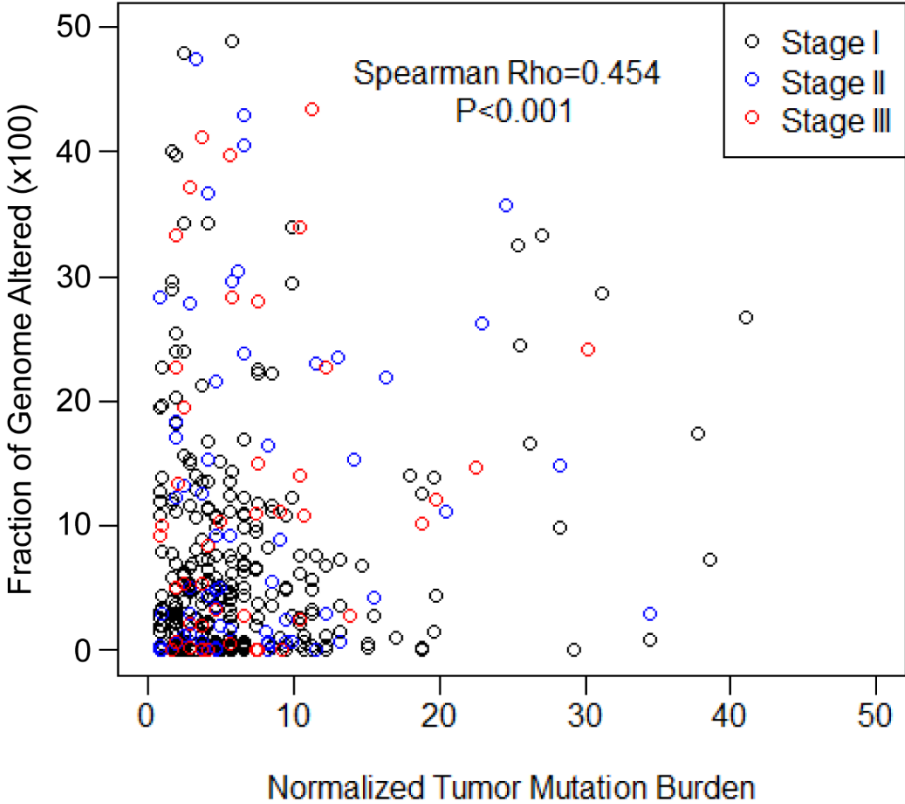

### eFigure 8. Histogram of the Relapse-Free Survival (RFS) Risk Score Computed Using PRecur, Integrating Clinical and Next-Generation Sequencing Data

The risk score is scaled between 0 and 10, with a higher score indicating a higher likelihood of worse RFS. Vertical dotted lines indicate optimized risk score cutoffs using the maximally selected rank statistic approach (RGs; low [L], intermediate [I], and high [H]). Concordance probability estimate (CPE) represents the actual versus predicted time to a RFS event across the cohort (N=426).

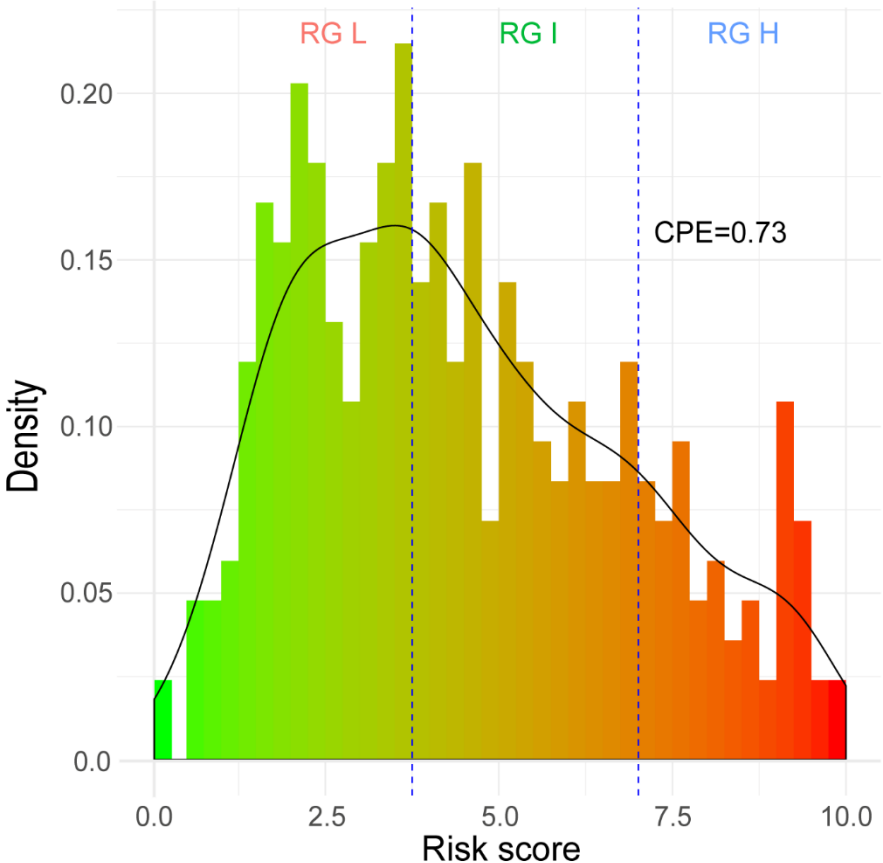

## eFigure 9. PRecur Prediction Model for Relapse-Free Survival (RFS) Using Integrated Clinicopathologic and Genomic Variables for Risk Stratification

(A) Oncoprint of genomic and clinicopathologic factors sorted by risk score from low to high (left to right). (B) Boxplots showing the concordance probability estimate (CPE) for RFS prediction using TNM criteria for adjuvant therapy as recommended by the National Comprehensive Cancer Network (NCCN) (node-negative patients with tumor size >4 cm; node-positive patients with any tumor size; node-positive patients with tumor size >4 cm) versus PRecur prediction model (left to right). Reported p value based on Wilcoxon paired test. FGA, fraction of genome altered; LVI, lymphovascular invasion; SUV, standardized uptake value; TMB, tumor mutation burden; VPI, visceral pleural invasion.

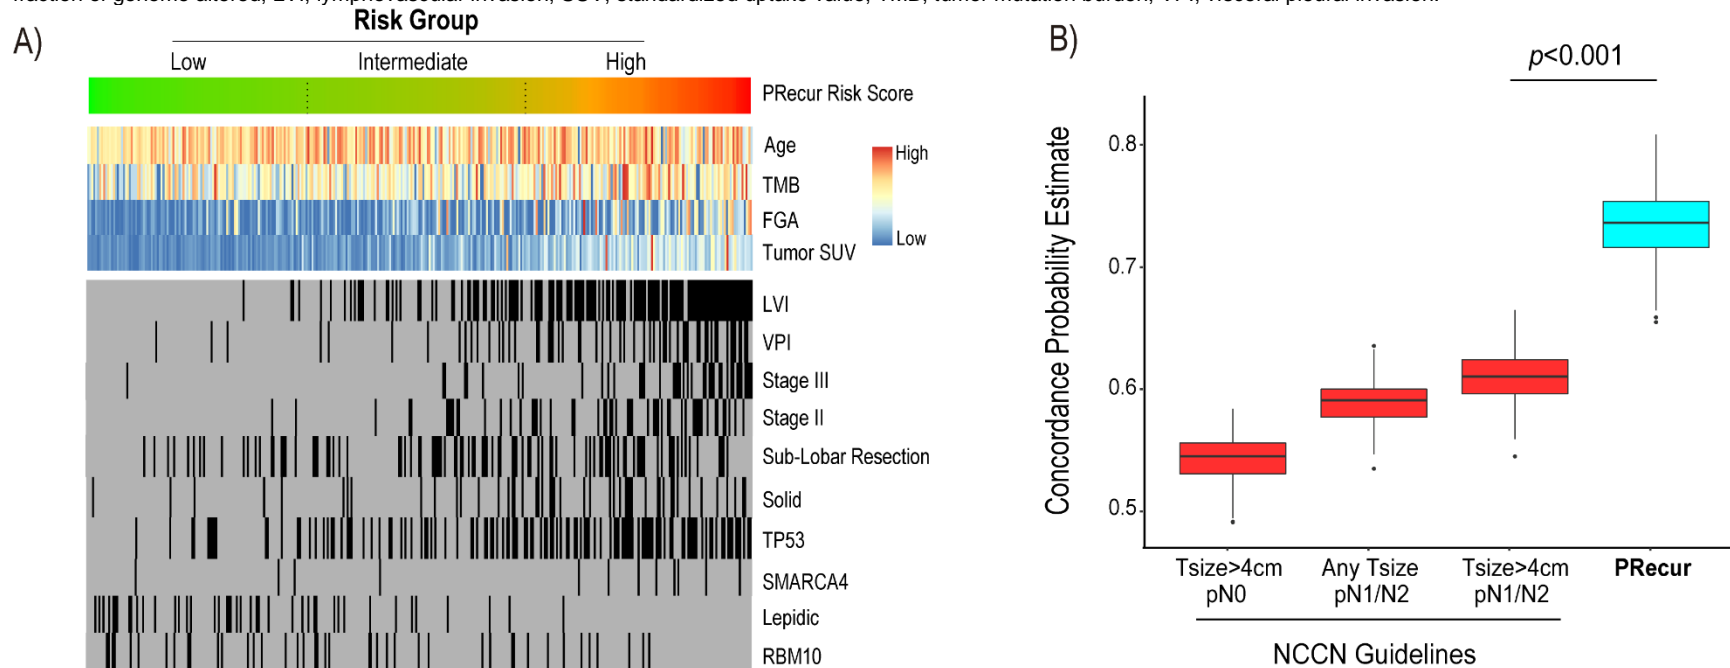

**eFigure 10. PRecur Prediction Model Including Only Patients in the MSK Cohort Whose Primary Tumor Did Not Harbor a Level 1 Actionable Mutation (n = 309)**

(A) Histogram of the relapse-free survival (RFS) risk score and concordance probability estimate (CPE). (B) Kaplan-Meier plot of 3-year RFS by risk group (low [L], intermediate [I], and high [H]).

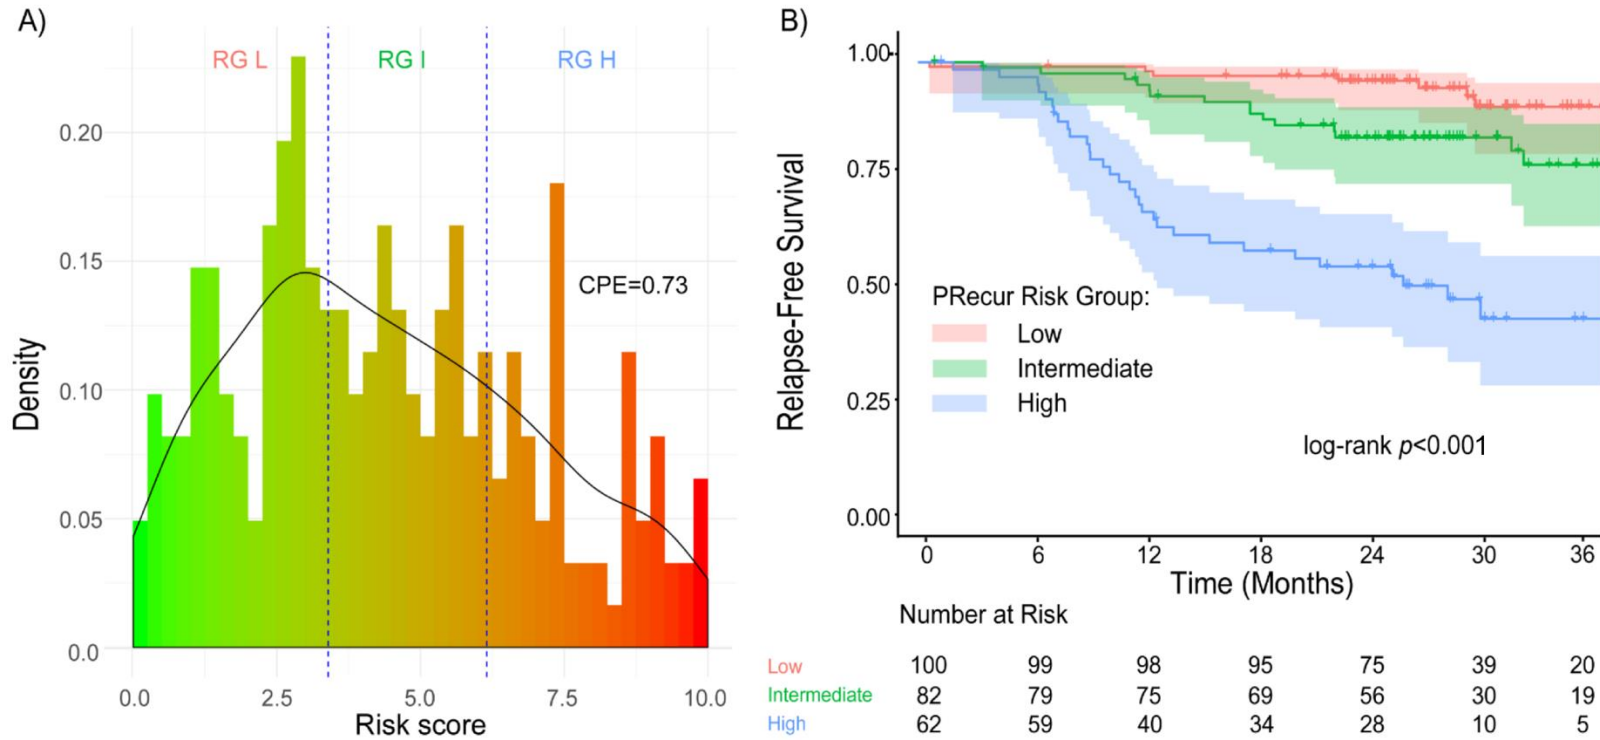

**eFigure 11. PRecur-ExVal Prediction Model for the MSK Cohort (n = 426)**

**Including only the clinicopathologic factors available in both ours and the TCGA datasets (age, sex, smoking status, pathologic stage), in addition to all genomic variables from the full PRecur model. (A) Histogram of the relapse-free survival (RFS) risk score and concordance probability estimate (CPE). (B) Kaplan-Meier plot of 3-year RFS by risk group (low [L], intermediate [I], and high [H]).**

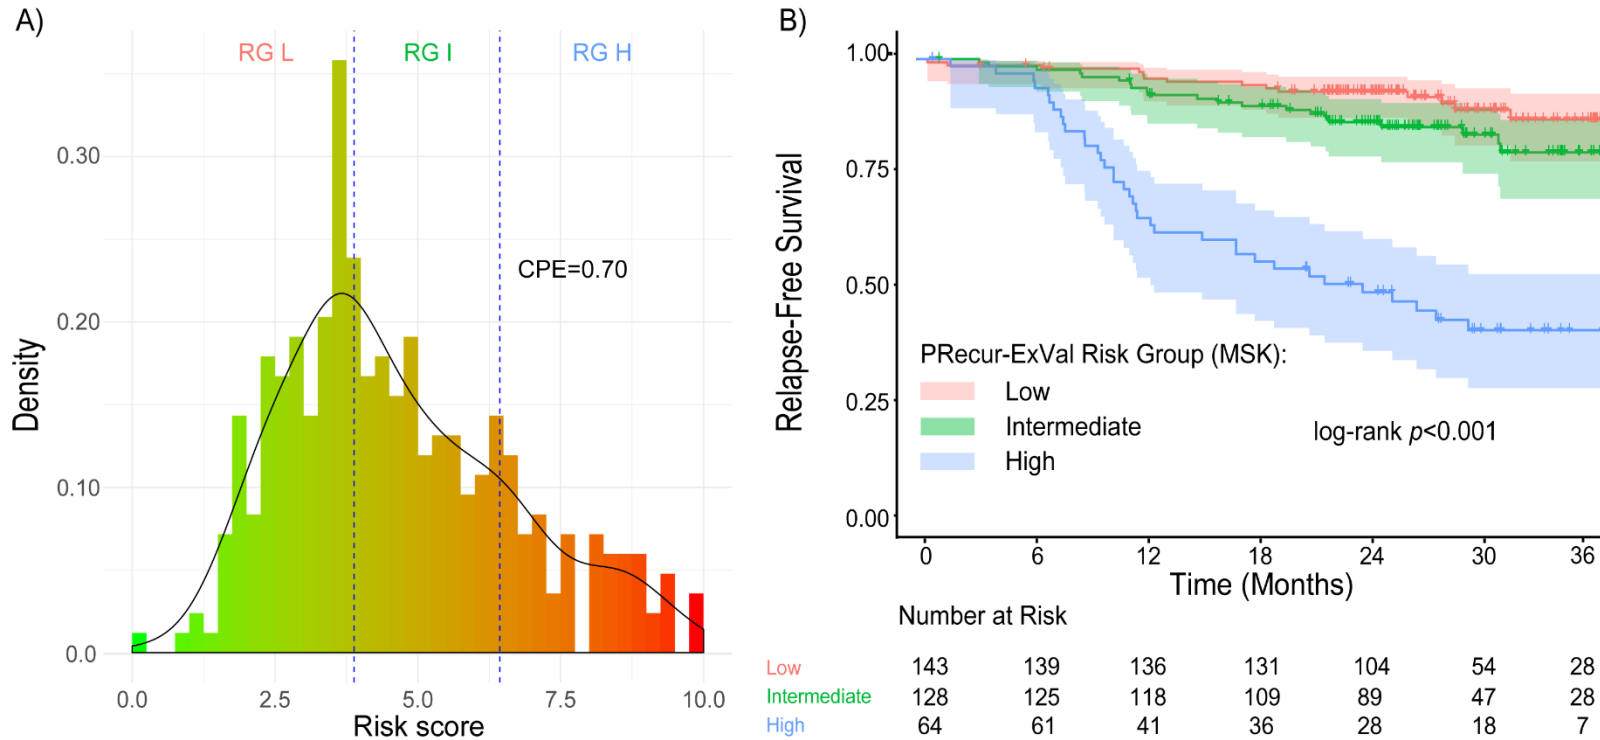



### eFigure 12. Histogram of the Relapse-Free Survival (RFS) Risk Score Computed Using PRecur-ExVal for the TCGA Data Set (n = 360)

Risk scores are scaled between 0 and 10, with a higher score indicating a higher likelihood of worse RFS. Vertical dotted lines indicate optimized risk score cutoffs using the maximally selected rank statistic approach (RGs; low [L], intermediate [I], and high [H]).

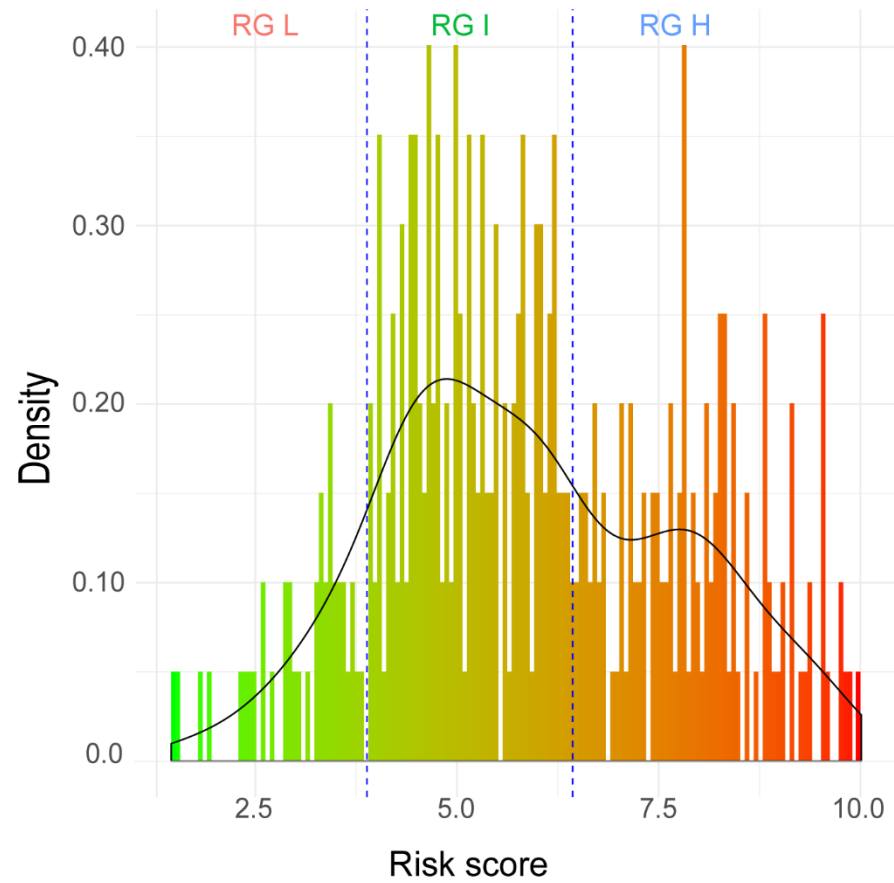

**eTable 1. Summary of Patterns of Recurrence (n = 75)**

| Variable                                                              | Median (IQR) or No. (%) |
|-----------------------------------------------------------------------|-------------------------|
| Time to first recurrence, months                                      | 13.8 (10.2-24.5)        |
| Recurrence confirmed via tissue biopsy                                | 55 (73%)                |
| General location of first recurrence, mutually exclusive <sup>a</sup> |                         |
| Distant                                                               | 28 (37%)                |
| Locoregional                                                          | 18 (24%)                |
| Locoregional and distant                                              | 29 (39%)                |
| First site of distant recurrence, not mutually exclusive (n=28)       |                         |
| Adrenal                                                               | 4 (14%)                 |
| Bone                                                                  | 21 (75%)                |
| Brain                                                                 | 12 (43%)                |
| Liver                                                                 | 4 (14%)                 |
| Other                                                                 | 6 (21%)                 |
| Multiple tissue types at first recurrence                             | 14 (19%)                |
| Site of all distant recurrences (includes first and subsequent)       |                         |
| Adrenal                                                               | 6 (8%)                  |
| Bone                                                                  | 30 (40%)                |
| Brain                                                                 | 16 (21%)                |
| Liver                                                                 | 6 (8%)                  |

<sup>a</sup>Distant recurrence was defined as recurrence to the opposite lung, pleura, or pleural fluid (any), any supraclavicular node, contralateral mediastinal nodes, and/or any other distant tissue or organ (American College of Chest Physicians guidelines<sup>1</sup>). IQR, interquartile range.

<sup>1</sup>Donington J, Ferguson M, Mazzone P, et al. American College of Chest Physicians and Society of Thoracic Surgeons consensus statement for evaluation and management for high-risk patients with stage I non-small cell lung cancer. *Chest* 2012;142:1620-35.

**eTable 2. Genes in the 468-Gene MSK-IMPACT Panel**

| Gene Symbol | First Design | OMIM   | EntrezGene | Ensembl         | Approved Name                                                           |
|-------------|--------------|--------|------------|-----------------|-------------------------------------------------------------------------|
| ABL1        | IMPACT-341   | 189980 | 25         | ENSG00000097007 | c-abl oncogene 1, non-receptor tyrosine kinase                          |
| ACVR1       | IMPACT-410   | 102576 | 90         | ENSG00000115170 | activin A receptor, type I                                              |
| AGO2        | IMPACT-468   | 606229 | 27161      | ENSG00000123908 | eukaryotic translation initiation factor 2C, 2                          |
| AKT1        | IMPACT-341   | 164730 | 207        | ENSG00000142208 | v-akt murine thymoma viral oncogene homolog 1                           |
| AKT2        | IMPACT-341   | 164731 | 208        | ENSG00000105221 | v-akt murine thymoma viral oncogene homolog 2                           |
| AKT3        | IMPACT-341   | 611223 | 10000      | ENSG00000117020 | v-akt murine thymoma viral oncogene homolog 3 (protein kinase B, gamma) |
| ALK         | IMPACT-341   | 105590 | 238        | ENSG00000171094 | anaplastic lymphoma receptor tyrosine kinase                            |
| ALOX12B     | IMPACT-341   | 603741 | 242        | ENSG00000179477 | arachidonate 12-lipoxygenase, 12R type                                  |
| ANKRD11     | IMPACT-410   | 611192 | 29123      | ENSG00000167522 | ankyrin repeat domain 11                                                |
| APC         | IMPACT-341   | 611731 | 324        | ENSG00000134982 | adenomatous polyposis coli                                              |
| AR          | IMPACT-341   | 313700 | 367        | ENSG00000169083 | androgen receptor                                                       |
| ARAF        | IMPACT-341   | 311010 | 369        | ENSG00000078061 | v-raf murine sarcoma 3611 viral oncogene homolog                        |
| ARID1A      | IMPACT-341   | 603024 | 8289       | ENSG00000117713 | AT rich interactive domain 1A (SWI-like)                                |
| ARID1B      | IMPACT-341   | 614556 | 57492      | ENSG00000049618 | AT rich interactive domain 1B (SWI1-like)                               |
| ARID2       | IMPACT-341   | 609539 | 196528     | ENSG00000189079 | AT rich interactive domain 2 (ARID, RFX-like)                           |
| ARID5B      | IMPACT-341   | 608538 | 84159      | ENSG00000150347 | AT rich interactive domain 5B (MRF1-like)                               |
| ASXL1       | IMPACT-341   | 612990 | 171023     | ENSG00000171456 | additional sex combs like 1 (Drosophila)                                |
| ASXL2       | IMPACT-341   | 612991 | 55252      | ENSG00000143970 | additional sex combs like 2 (Drosophila)                                |
| ATM         | IMPACT-341   | 607585 | 472        | ENSG00000149311 | ataxia telangiectasia mutated                                           |
| ATR         | IMPACT-341   | 601215 | 545        | ENSG00000175054 | ataxia telangiectasia and Rad3 related                                  |
| ATRX        | IMPACT-341   | 300032 | 546        | ENSG00000085224 | alpha thalassemia/mental retardation syndrome X-linked                  |
| AURKA       | IMPACT-341   | 603072 | 6790       | ENSG00000087586 | aurora kinase A                                                         |
| AURKB       | IMPACT-341   | 604970 | 9212       | ENSG00000178999 | aurora kinase B                                                         |
| AXIN1       | IMPACT-341   | 603816 | 8312       | ENSG00000103126 | axin 1                                                                  |
| AXIN2       | IMPACT-341   | 604025 | 8313       | ENSG00000168646 | axin 2                                                                  |
| AXL         | IMPACT-341   | 109135 | 558        | ENSG00000167601 | AXL receptor tyrosine kinase                                            |
| B2M         | IMPACT-341   | 109700 | 567        | ENSG00000166710 | beta-2-microglobulin                                                    |
| BABAM1      | IMPACT-468   | 612766 | 29086      | ENSG00000105393 | chromosome 19 open reading frame 62                                     |
| BAP1        | IMPACT-341   | 603089 | 8314       | ENSG00000163930 | BRCA1 associated protein-1 (ubiquitin carboxy-terminal hydrolase)       |

|         |            |        |       |                 |                                                                                           |
|---------|------------|--------|-------|-----------------|-------------------------------------------------------------------------------------------|
| BARD1   | IMPACT-341 | 601593 | 580   | ENSG00000138376 | BRCA1 associated RING domain 1                                                            |
| BBC3    | IMPACT-341 | 605854 | 27113 | ENSG00000105327 | BCL2 binding component 3                                                                  |
| BCL10   | IMPACT-410 | 603517 | 8915  | ENSG00000142867 | B-cell CLL/lymphoma 10                                                                    |
| BCL2    | IMPACT-341 | 151430 | 596   | ENSG00000171791 | B-cell CLL/lymphoma 2                                                                     |
| BCL2L1  | IMPACT-341 | 600039 | 598   | ENSG00000171552 | BCL2-like 1                                                                               |
| BCL2L11 | IMPACT-341 | 603827 | 10018 | ENSG00000153094 | BCL2-like 11 (apoptosis facilitator)                                                      |
| BCL6    | IMPACT-341 | 109565 | 604   | ENSG00000113916 | B-cell CLL/lymphoma 6                                                                     |
| BCOR    | IMPACT-341 | 300485 | 54880 | ENSG00000183337 | BCL6 corepressor                                                                          |
| BIRC3   | IMPACT-410 | 601721 | 330   | ENSG00000023445 | baculoviral IAP repeat-containing 3                                                       |
| BLM     | IMPACT-341 | 604610 | 641   | ENSG00000197299 | Bloom syndrome, RecQ helicase-like                                                        |
| BMPR1A  | IMPACT-341 | 601299 | 657   | ENSG00000107779 | bone morphogenetic protein receptor, type IA                                              |
| BRAF    | IMPACT-341 | 164757 | 673   | ENSG00000157764 | v-raf murine sarcoma viral oncogene homolog B1                                            |
| BRCA1   | IMPACT-341 | 113705 | 672   | ENSG00000012048 | breast cancer 1, early onset                                                              |
| BRCA2   | IMPACT-341 | 600185 | 675   | ENSG00000139618 | breast cancer 2, early onset                                                              |
| BRD4    | IMPACT-341 | 608749 | 23476 | ENSG00000141867 | bromodomain containing 4                                                                  |
| BRIP1   | IMPACT-341 | 605882 | 83990 | ENSG00000136492 | BRCA1 interacting protein C-terminal helicase 1                                           |
| BTK     | IMPACT-341 | 300300 | 695   | ENSG00000010671 | Bruton agammaglobulinemia tyrosine kinase                                                 |
| CALR    | IMPACT-410 | 109091 | 811   | ENSG00000179218 | calreticulin                                                                              |
| CARD11  | IMPACT-341 | 607210 | 84433 | ENSG00000198286 | caspase recruitment domain family, member 11                                              |
| CARM1   | IMPACT-468 | 603934 | 10498 | ENSG00000142453 | coactivator-associated arginine methyltransferase 1                                       |
| CASP8   | IMPACT-341 | 601763 | 841   | ENSG00000064012 | caspase 8, apoptosis-related cysteine peptidase                                           |
| CBFB    | IMPACT-341 | 121360 | 865   | ENSG00000067955 | core-binding factor, beta subunit                                                         |
| CBL     | IMPACT-341 | 165360 | 867   | ENSG00000110395 | Cas-Br-M (murine) ecotropic retroviral transforming sequence                              |
| CCND1   | IMPACT-341 | 168461 | 595   | ENSG00000110092 | cyclin D1                                                                                 |
| CCND2   | IMPACT-341 | 123833 | 894   | ENSG00000118971 | cyclin D2                                                                                 |
| CCND3   | IMPACT-341 | 123834 | 896   | ENSG00000112576 | cyclin D3                                                                                 |
| CCNE1   | IMPACT-341 | 123837 | 898   | ENSG00000105173 | cyclin E1                                                                                 |
| CD274   | IMPACT-341 | 605402 | 29126 | ENSG00000120217 | CD274 molecule                                                                            |
| CD276   | IMPACT-341 | 605715 | 80381 | ENSG00000103855 | CD276 molecule                                                                            |
| CD79A   | IMPACT-410 | 112205 | 973   | ENSG00000105369 | CD79a molecule, immunoglobulin-associated alpha                                           |
| CD79B   | IMPACT-341 | 147245 | 974   | ENSG00000007312 | CD79b molecule, immunoglobulin-associated beta                                            |
| CDC42   | IMPACT-468 | 116952 | 998   | ENSG00000070831 | cell division cycle 42 (GTP binding protein, 25kDa)                                       |
| CDC73   | IMPACT-341 | 607393 | 79577 | ENSG00000134371 | cell division cycle 73, Paf1/RNA polymerase II complex component, homolog (S. cerevisiae) |
| CDH1    | IMPACT-341 | 192090 | 999   | ENSG00000039068 | cadherin 1, type 1, E-cadherin (epithelial)                                               |
| CDK12   | IMPACT-341 | 615514 | 51755 | ENSG00000167258 | cyclin-dependent kinase 12                                                                |

|         |            |        |       |                 |                                                                              |
|---------|------------|--------|-------|-----------------|------------------------------------------------------------------------------|
| CDK4    | IMPACT-341 | 123829 | 1019  | ENSG00000135446 | cyclin-dependent kinase 4                                                    |
| CDK6    | IMPACT-341 | 603368 | 1021  | ENSG00000105810 | cyclin-dependent kinase 6                                                    |
| CDK8    | IMPACT-341 | 603184 | 1024  | ENSG00000132964 | cyclin-dependent kinase 8                                                    |
| CDKN1A  | IMPACT-341 | 116899 | 1026  | ENSG00000124762 | cyclin-dependent kinase inhibitor 1A (p21, Cip1)                             |
| CDKN1B  | IMPACT-341 | 600778 | 1027  | ENSG00000111276 | cyclin-dependent kinase inhibitor 1B (p27, Kip1)                             |
| CDKN2A  | IMPACT-341 | 600160 | 1029  | ENSG00000147889 | cyclin-dependent kinase inhibitor 2A (melanoma, p16, inhibits CDK4)          |
| CDKN2B  | IMPACT-341 | 600431 | 1030  | ENSG00000147883 | cyclin-dependent kinase inhibitor 2B (p15, inhibits CDK4)                    |
| CDKN2C  | IMPACT-341 | 603369 | 1031  | ENSG00000123080 | cyclin-dependent kinase inhibitor 2C (p18, inhibits CDK4)                    |
| CEBPA   | IMPACT-410 | 116897 | 1050  | ENSG00000245848 | CCAAT/enhancer binding protein (C/EBP), alpha                                |
| CENPA   | IMPACT-410 | 117139 | 1058  | ENSG00000115163 | centromere protein A                                                         |
| CHEK1   | IMPACT-341 | 603078 | 1111  | ENSG00000149554 | CHK1 checkpoint homolog (S. pombe)                                           |
| CHEK2   | IMPACT-341 | 604373 | 11200 | ENSG00000183765 | CHK2 checkpoint homolog (S. pombe)                                           |
| CIC     | IMPACT-341 | 612082 | 23152 | ENSG00000079432 | capicua homolog (Drosophila)                                                 |
| CREBBP  | IMPACT-341 | 600140 | 1387  | ENSG00000005339 | CREB binding protein                                                         |
| CRKL    | IMPACT-341 | 602007 | 1399  | ENSG00000099942 | v-crk sarcoma virus CT10 oncogene homolog (avian)-like                       |
| CRLF2   | IMPACT-341 | 400023 | 64109 | ENSG00000205755 | cytokine receptor-like factor 2                                              |
| CSDE1   | IMPACT-468 | 191510 | 7812  | ENSG00000009307 | cold shock domain containing E1, RNA-binding                                 |
| CSF1R   | IMPACT-341 | 164770 | 1436  | ENSG00000182578 | colony stimulating factor 1 receptor                                         |
| CSF3R   | IMPACT-410 | 138971 | 1441  | ENSG00000119535 | colony stimulating factor 3 receptor (granulocyte)                           |
| CTCF    | IMPACT-341 | 604167 | 10664 | ENSG00000102974 | CCCTC-binding factor (zinc finger protein)                                   |
| CTLA4   | IMPACT-341 | 123890 | 1493  | ENSG00000163599 | cytotoxic T-lymphocyte-associated protein 4                                  |
| CTNNB1  | IMPACT-341 | 116806 | 1499  | ENSG00000168036 | catenin (cadherin-associated protein), beta 1, 88kDa                         |
| CUL3    | IMPACT-341 | 603136 | 8452  | ENSG00000036257 | cullin 3                                                                     |
| CXCR4   | IMPACT-410 | 162643 | 7852  | ENSG00000121966 | chemokine (C-X-C motif) receptor 4                                           |
| CYLD    | IMPACT-468 | 605018 | 1540  | ENSG00000083799 | cylindromatosis (turban tumor syndrome)                                      |
| CYSLTR2 | IMPACT-468 | 605666 | 57105 | ENSG00000152207 | cysteinyl leukotriene receptor 2                                             |
| DAXX    | IMPACT-341 | 603186 | 1616  | ENSG00000204209 | death-domain associated protein                                              |
| DCUN1D1 | IMPACT-341 | 605905 | 54165 | ENSG00000043093 | DCN1, defective in cullin neddylation 1, domain containing 1 (S. cerevisiae) |
| DDR2    | IMPACT-341 | 191311 | 4921  | ENSG00000162733 | discoidin domain receptor tyrosine kinase 2                                  |
| DICER1  | IMPACT-341 | 606241 | 23405 | ENSG00000100697 | dicer 1, ribonuclease type III                                               |
| DIS3    | IMPACT-341 | 607533 | 22894 | ENSG00000083520 | DIS3 mitotic control homolog (S. cerevisiae)                                 |

|        |            |        |       |                 |                                                                                                                                     |
|--------|------------|--------|-------|-----------------|-------------------------------------------------------------------------------------------------------------------------------------|
| DNAJB1 | IMPACT-410 | 604572 | 3337  | ENSG00000132002 | DnaJ (Hsp40) homolog, subfamily B, member 1                                                                                         |
| DNMT1  | IMPACT-341 | 126375 | 1786  | ENSG00000130816 | DNA (cytosine-5-)-methyltransferase 1                                                                                               |
| DNMT3A | IMPACT-341 | 602769 | 1788  | ENSG00000119772 | DNA (cytosine-5-)-methyltransferase 3 alpha                                                                                         |
| DNMT3B | IMPACT-341 | 602900 | 1789  | ENSG00000088305 | DNA (cytosine-5-)-methyltransferase 3 beta                                                                                          |
| DOT1L  | IMPACT-341 | 607375 | 84444 | ENSG00000104885 | DOT1-like, histone H3 methyltransferase ( <i>S. cerevisiae</i> )                                                                    |
| DROSHA | IMPACT-468 | 608828 | 29102 | ENSG00000113360 | drosha, ribonuclease type III                                                                                                       |
| DUSP4  | IMPACT-468 | 602747 | 1846  | ENSG00000120875 | dual specificity phosphatase 4                                                                                                      |
| E2F3   | IMPACT-341 | 600427 | 1871  | ENSG00000112242 | E2F transcription factor 3                                                                                                          |
| EED    | IMPACT-341 | 605984 | 8726  | ENSG00000074266 | embryonic ectoderm development                                                                                                      |
| EGFL7  | IMPACT-341 | 608582 | 51162 | ENSG00000172889 | EGF-like-domain, multiple 7                                                                                                         |
| EGFR   | IMPACT-341 | 131550 | 1956  | ENSG00000146648 | epidermal growth factor receptor                                                                                                    |
| EIF1AX | IMPACT-341 | 300186 | 1964  | ENSG00000173674 | eukaryotic translation initiation factor 1A, X-linked                                                                               |
| EIF4A2 | IMPACT-410 | 601102 | 1974  | ENSG00000156976 | eukaryotic translation initiation factor 4A2                                                                                        |
| EIF4E  | IMPACT-410 | 133440 | 1977  | ENSG00000151247 | eukaryotic translation initiation factor 4E                                                                                         |
| ELF3   | IMPACT-468 | 602191 | 1999  | ENSG00000163435 | E74-like factor 3 (ets domain transcription factor, epithelial-specific )                                                           |
| EP300  | IMPACT-341 | 602700 | 2033  | ENSG00000100393 | E1A binding protein p300                                                                                                            |
| EPAS1  | IMPACT-468 | 603349 | 2034  | ENSG00000116016 | endothelial PAS domain protein 1                                                                                                    |
| EPCAM  | IMPACT-341 | 185535 | 4072  | ENSG00000119888 | epithelial cell adhesion molecule                                                                                                   |
| EPHA3  | IMPACT-341 | 179611 | 2042  | ENSG00000044524 | EPH receptor A3                                                                                                                     |
| EPHA5  | IMPACT-341 | 600004 | 2044  | ENSG00000145242 | EPH receptor A5                                                                                                                     |
| EPHA7  | IMPACT-410 | 602190 | 2045  | ENSG00000135333 | EPH receptor A7                                                                                                                     |
| EPHB1  | IMPACT-341 | 600600 | 2047  | ENSG00000154928 | EPH receptor B1                                                                                                                     |
| ERBB2  | IMPACT-341 | 164870 | 2064  | ENSG00000141736 | v-erb-b2 erythroblastic leukemia viral oncogene homolog 2, neuro/glioblastoma derived oncogene homolog (avian)                      |
| ERBB3  | IMPACT-341 | 190151 | 2065  | ENSG00000065361 | v-erb-b2 erythroblastic leukemia viral oncogene homolog 3 (avian)                                                                   |
| ERBB4  | IMPACT-341 | 600543 | 2066  | ENSG00000178568 | v-erb-a erythroblastic leukemia viral oncogene homolog 4 (avian)                                                                    |
| ERCC2  | IMPACT-341 | 126340 | 2068  | ENSG00000104884 | excision repair cross-complementing rodent repair deficiency, complementation group 2                                               |
| ERCC3  | IMPACT-341 | 133510 | 2071  | ENSG00000163161 | excision repair cross-complementing rodent repair deficiency, complementation group 3 (xeroderma pigmentosum group B complementing) |
| ERCC4  | IMPACT-341 | 133520 | 2072  | ENSG00000175595 | excision repair cross-complementing rodent repair deficiency, complementation group 4                                               |

|         |            |        |        |                 |                                                                                                          |
|---------|------------|--------|--------|-----------------|----------------------------------------------------------------------------------------------------------|
| ERCC5   | IMPACT-341 | 133530 | 2073   | ENSG00000134899 | excision repair cross-complementing rodent repair deficiency, complementation group 5                    |
| ERF     | IMPACT-468 | 611888 | 2077   | ENSG00000105722 | Ets2 repressor factor                                                                                    |
| ERG     | IMPACT-341 | 165080 | 2078   | ENSG00000157554 | v-ets erythroblastosis virus E26 oncogene homolog (avian)                                                |
| ERRFI1  | IMPACT-410 | 608069 | 54206  | ENSG00000116285 | ERBB receptor feedback inhibitor 1                                                                       |
| ESR1    | IMPACT-341 | 133430 | 2099   | ENSG00000091831 | estrogen receptor 1                                                                                      |
| ETV1    | IMPACT-341 | 600541 | 2115   | ENSG00000006468 | ets variant 1                                                                                            |
| ETV6    | IMPACT-341 | 600618 | 2120   | ENSG00000139083 | ets variant 6                                                                                            |
| EZH1    | IMPACT-468 | 601674 | 2145   | ENSG00000108799 | enhancer of zeste homolog 1 (Drosophila)                                                                 |
| EZH2    | IMPACT-341 | 601573 | 2146   | ENSG00000106462 | enhancer of zeste homolog 2 (Drosophila)                                                                 |
| FAM123B | IMPACT-341 | 300647 | 139285 | ENSG00000184675 | family with sequence similarity 123B                                                                     |
| FAM175A | IMPACT-341 | 611143 | 84142  | ENSG00000163322 | family with sequence similarity 175, member A                                                            |
| FAM46C  | IMPACT-341 | 613952 | 54855  | ENSG00000183508 | family with sequence similarity 46, member C                                                             |
| FAM58A  | IMPACT-468 | 300708 | 92002  | ENSG00000262919 | family with sequence similarity 58, member A                                                             |
| FANCA   | IMPACT-341 | 607139 | 2175   | ENSG00000187741 | Fanconi anemia, complementation group A                                                                  |
| FANCC   | IMPACT-341 | 613899 | 2176   | ENSG00000158169 | Fanconi anemia, complementation group C                                                                  |
| FAT1    | IMPACT-341 | 600976 | 2195   | ENSG00000083857 | FAT tumor suppressor homolog 1 (Drosophila)                                                              |
| FBXW7   | IMPACT-341 | 606278 | 55294  | ENSG00000109670 | F-box and WD repeat domain containing 7                                                                  |
| FGF19   | IMPACT-341 | 603891 | 9965   | ENSG00000162344 | fibroblast growth factor 19                                                                              |
| FGF3    | IMPACT-341 | 164950 | 2248   | ENSG00000186895 | fibroblast growth factor 3                                                                               |
| FGF4    | IMPACT-341 | 164980 | 2249   | ENSG00000075388 | fibroblast growth factor 4                                                                               |
| FGFR1   | IMPACT-341 | 136350 | 2260   | ENSG00000077782 | fibroblast growth factor receptor 1                                                                      |
| FGFR2   | IMPACT-341 | 176943 | 2263   | ENSG00000066468 | fibroblast growth factor receptor 2                                                                      |
| FGFR3   | IMPACT-341 | 134934 | 2261   | ENSG00000068078 | fibroblast growth factor receptor 3                                                                      |
| FGFR4   | IMPACT-341 | 134935 | 2264   | ENSG00000160867 | fibroblast growth factor receptor 4                                                                      |
| FH      | IMPACT-341 | 136850 | 2271   | ENSG00000091483 | fumarate hydratase                                                                                       |
| FLCN    | IMPACT-341 | 607273 | 201163 | ENSG00000154803 | folliculin                                                                                               |
| FLT1    | IMPACT-341 | 165070 | 2321   | ENSG00000102755 | fms-related tyrosine kinase 1 (vascular endothelial growth factor/vascular permeability factor receptor) |
| FLT3    | IMPACT-341 | 136351 | 2322   | ENSG00000122025 | fms-related tyrosine kinase 3                                                                            |
| FLT4    | IMPACT-341 | 136352 | 2324   | ENSG00000037280 | fms-related tyrosine kinase 4                                                                            |
| FOXA1   | IMPACT-341 | 602294 | 3169   | ENSG00000129514 | forkhead box A1                                                                                          |
| FOXL2   | IMPACT-341 | 605597 | 668    | ENSG00000183770 | forkhead box L2                                                                                          |
| FOXO1   | IMPACT-410 | 136533 | 2308   | ENSG00000150907 | forkhead box O1                                                                                          |

|           |            |        |        |                 |                                                                        |
|-----------|------------|--------|--------|-----------------|------------------------------------------------------------------------|
| FOXP1     | IMPACT-341 | 605515 | 27086  | ENSG00000114861 | forkhead box P1                                                        |
| FUBP1     | IMPACT-341 | 603444 | 8880   | ENSG00000162613 | far upstream element (FUSE) binding protein 1                          |
| FYN       | IMPACT-410 | 137025 | 2534   | ENSG00000010810 | FYN oncogene related to SRC, FGR, YES                                  |
| GATA1     | IMPACT-341 | 305371 | 2623   | ENSG00000102145 | GATA binding protein 1 (globin transcription factor 1)                 |
| GATA2     | IMPACT-341 | 137295 | 2624   | ENSG00000179348 | GATA binding protein 2                                                 |
| GATA3     | IMPACT-341 | 131320 | 2625   | ENSG00000107485 | GATA binding protein 3                                                 |
| GLI1      | IMPACT-410 | 165220 | 2735   | ENSG00000111087 | GLI family zinc finger 1                                               |
| GNA11     | IMPACT-341 | 139313 | 2767   | ENSG00000088256 | guanine nucleotide binding protein (G protein), alpha 11 (Gq class)    |
| GNAQ      | IMPACT-341 | 600998 | 2776   | ENSG00000156052 | guanine nucleotide binding protein (G protein), q polypeptide          |
| GNAS      | IMPACT-341 | 139320 | 2778   | ENSG00000087460 | GNAS complex locus                                                     |
| GPS2      | IMPACT-410 | 601935 | 2874   | ENSG00000132522 | G protein pathway suppressor 2                                         |
| GREM1     | IMPACT-341 | 603054 | 26585  | ENSG00000166923 | gremlin 1                                                              |
| GRIN2A    | IMPACT-341 | 138253 | 2903   | ENSG00000183454 | glutamate receptor, ionotropic, N-methyl D-aspartate 2A                |
| GSK3B     | IMPACT-341 | 605004 | 2932   | ENSG00000082701 | glycogen synthase kinase 3 beta                                        |
| H3F3A     | IMPACT-410 | 601128 | 3020   | ENSG00000163041 | H3 histone, family 3A                                                  |
| H3F3B     | IMPACT-410 | 601058 | 3021   | ENSG00000132475 | H3 histone, family 3B (H3.3B)                                          |
| H3F3C     | IMPACT-341 | 616134 | 440093 | ENSG00000188375 | H3 histone, family 3C                                                  |
| HGF       | IMPACT-341 | 142409 | 3082   | ENSG00000019991 | hepatocyte growth factor (hepapoietin A; scatter factor)               |
| HIST1H1C  | IMPACT-341 | 142710 | 3006   | ENSG00000187837 | histone cluster 1, H1c                                                 |
| HIST1H2BD | IMPACT-341 | 602799 | 3017   | ENSG00000158373 | histone cluster 1, H2bd                                                |
| HIST1H3A  | IMPACT-410 | 602810 | 8350   | ENSG00000275714 | histone cluster 1, H3a                                                 |
| HIST1H3B  | IMPACT-341 | 602819 | 8358   | ENSG00000286522 | histone cluster 1, H3b                                                 |
| HIST1H3C  | IMPACT-410 | 602812 | 8352   | ENSG00000287080 | histone cluster 1, H3c                                                 |
| HIST1H3D  | IMPACT-410 | 602811 | 8351   | ENSG00000197409 | histone cluster 1, H3d                                                 |
| HIST1H3E  | IMPACT-410 | 602813 | 8353   | ENSG00000274750 | histone cluster 1, H3e                                                 |
| HIST1H3F  | IMPACT-410 | 602816 | 8968   | ENSG00000277775 | histone cluster 1, H3f                                                 |
| HIST1H3G  | IMPACT-410 | 602815 | 8355   | ENSG00000273983 | histone cluster 1, H3g                                                 |
| HIST1H3H  | IMPACT-410 | 602818 | 8357   | ENSG00000278828 | histone cluster 1, H3h                                                 |
| HIST1H3I  | IMPACT-410 | 602814 | 8354   | ENSG00000275379 | histone cluster 1, H3i                                                 |
| HIST1H3J  | IMPACT-410 | 602817 | 8356   | ENSG00000197153 | histone cluster 1, H3j                                                 |
| HIST2H3C  | IMPACT-410 | 142780 | 126961 | ENSG00000203811 | histone cluster 2, H3c                                                 |
| HIST2H3D  | IMPACT-410 | NA     | 653604 | ENSG00000183598 | histone cluster 2, H3d                                                 |
| HIST3H3   | IMPACT-410 | 602820 | 8290   | ENSG00000168148 | histone cluster 3, H3                                                  |
| HLA-A     | IMPACT-410 | 142800 | 3105   | ENSG00000206503 | major histocompatibility complex, class I, A                           |
| HLA-B     | IMPACT-468 | 142830 | 3106   | ENSG00000234745 | major histocompatibility complex, class I, B                           |
| HNF1A     | IMPACT-341 | 142410 | 6927   | ENSG00000135100 | HNF1 homeobox A                                                        |
| HOXB13    | IMPACT-410 | 604607 | 10481  | ENSG00000159184 | homeobox B13                                                           |
| HRAS      | IMPACT-341 | 190020 | 3265   | ENSG00000174775 | v-Ha-ras Harvey rat sarcoma viral oncogene homolog                     |
| ICOSLG    | IMPACT-341 | 605717 | 23308  | ENSG00000160223 | inducible T-cell co-stimulator ligand                                  |
| ID3       | IMPACT-410 | 600277 | 3399   | ENSG00000117318 | inhibitor of DNA binding 3, dominant negative helix-loop-helix protein |



|        |            |        |        |                 |                                                                               |
|--------|------------|--------|--------|-----------------|-------------------------------------------------------------------------------|
| IDH1   | IMPACT-341 | 147700 | 3417   | ENSG00000138413 | isocitrate dehydrogenase 1 (NADP+), soluble                                   |
| IDH2   | IMPACT-341 | 147650 | 3418   | ENSG00000182054 | isocitrate dehydrogenase 2 (NADP+), mitochondrial                             |
| IFNGR1 | IMPACT-341 | 107470 | 3459   | ENSG00000027697 | interferon gamma receptor 1                                                   |
| IGF1   | IMPACT-341 | 147440 | 3479   | ENSG00000017427 | insulin-like growth factor 1 (somatomedin C)                                  |
| IGF1R  | IMPACT-341 | 147370 | 3480   | ENSG00000140443 | insulin-like growth factor 1 receptor                                         |
| IGF2   | IMPACT-341 | 147470 | 3481   | ENSG00000167244 | insulin-like growth factor 2 (somatomedin A)                                  |
| IKBKE  | IMPACT-341 | 605048 | 9641   | ENSG00000263528 | inhibitor of kappa light polypeptide gene enhancer in B-cells, kinase epsilon |
| IKZF1  | IMPACT-341 | 603023 | 10320  | ENSG00000185811 | IKAROS family zinc finger 1 (Ikaros)                                          |
| IL10   | IMPACT-341 | 124092 | 3586   | ENSG00000136634 | interleukin 10                                                                |
| IL7R   | IMPACT-341 | 146661 | 3575   | ENSG00000168685 | interleukin 7 receptor                                                        |
| INHA   | IMPACT-410 | 147380 | 3623   | ENSG00000123999 | inhibin, alpha                                                                |
| INHBA  | IMPACT-410 | 147290 | 3624   | ENSG00000122641 | inhibin, beta A                                                               |
| INPP4A | IMPACT-341 | 600916 | 3631   | ENSG00000040933 | inositol polyphosphate-4-phosphatase, type I, 107kDa                          |
| INPP4B | IMPACT-341 | 607494 | 8821   | ENSG00000109452 | inositol polyphosphate-4-phosphatase, type II, 105kDa                         |
| INPPL1 | IMPACT-468 | 600829 | 3636   | ENSG00000165458 | inositol polyphosphate phosphatase-like 1                                     |
| INSR   | IMPACT-341 | 147670 | 3643   | ENSG00000171105 | insulin receptor                                                              |
| IRF4   | IMPACT-341 | 601900 | 3662   | ENSG00000137265 | interferon regulatory factor 4                                                |
| IRS1   | IMPACT-341 | 147545 | 3667   | ENSG00000169047 | insulin receptor substrate 1                                                  |
| IRS2   | IMPACT-341 | 600797 | 8660   | ENSG00000185950 | insulin receptor substrate 2                                                  |
| JAK1   | IMPACT-341 | 147795 | 3716   | ENSG00000162434 | Janus kinase 1                                                                |
| JAK2   | IMPACT-341 | 147796 | 3717   | ENSG00000096968 | Janus kinase 2                                                                |
| JAK3   | IMPACT-341 | 600173 | 3718   | ENSG00000105639 | Janus kinase 3                                                                |
| JUN    | IMPACT-341 | 165160 | 3725   | ENSG00000177606 | jun proto-oncogene                                                            |
| KDM5A  | IMPACT-341 | 180202 | 5927   | ENSG00000073614 | lysine (K)-specific demethylase 5A                                            |
| KDM5C  | IMPACT-341 | 314690 | 8242   | ENSG00000126012 | lysine (K)-specific demethylase 5C                                            |
| KDM6A  | IMPACT-341 | 300128 | 7403   | ENSG00000147050 | lysine (K)-specific demethylase 6A                                            |
| KDR    | IMPACT-341 | 191306 | 3791   | ENSG00000128052 | kinase insert domain receptor (a type III receptor tyrosine kinase)           |
| KEAP1  | IMPACT-341 | 606016 | 9817   | ENSG00000079999 | kelch-like ECH-associated protein 1                                           |
| KIT    | IMPACT-341 | 164920 | 3815   | ENSG00000157404 | v-kit Hardy-Zuckerman 4 feline sarcoma viral oncogene homolog                 |
| KLF4   | IMPACT-341 | 602253 | 9314   | ENSG00000136826 | Kruppel-like factor 4 (gut)                                                   |
| KMT2B  | IMPACT-468 | 606834 | 9757   | ENSG00000272333 | myeloid/lymphoid or mixed-lineage leukemia 4                                  |
| KMT5A  | IMPACT-468 | 607240 | 387893 | ENSG00000183955 | SET domain containing (lysine methyltransferase) 8                            |
| KNSTRN | IMPACT-468 | 614718 | 90417  | ENSG00000128944 | chromosome 15 open reading frame 23                                           |

|         |            |        |           |                 |                                                                            |
|---------|------------|--------|-----------|-----------------|----------------------------------------------------------------------------|
| KRAS    | IMPACT-341 | 190070 | 3845      | ENSG00000133703 | v-Ki-ras2 Kirsten rat sarcoma viral oncogene homolog                       |
| LATS1   | IMPACT-341 | 603473 | 9113      | ENSG00000131023 | LATS, large tumor suppressor, homolog 1 (Drosophila)                       |
| LATS2   | IMPACT-341 | 604861 | 26524     | ENSG00000150457 | LATS, large tumor suppressor, homolog 2 (Drosophila)                       |
| LMO1    | IMPACT-341 | 186921 | 4004      | ENSG00000166407 | LIM domain only 1 (rhombotin 1)                                            |
| LYN     | IMPACT-468 | 165120 | 4067      | ENSG00000254087 | v-yes-1 Yamaguchi sarcoma viral related oncogene homolog                   |
| MALT1   | IMPACT-410 | 604860 | 10892     | ENSG00000172175 | mucosa associated lymphoid tissue lymphoma translocation gene 1            |
| MAP2K1  | IMPACT-341 | 176872 | 5604      | ENSG00000169032 | mitogen-activated protein kinase kinase 1                                  |
| MAP2K2  | IMPACT-341 | 601263 | 5605      | ENSG00000126934 | mitogen-activated protein kinase kinase 2                                  |
| MAP2K4  | IMPACT-341 | 601335 | 6416      | ENSG00000065559 | mitogen-activated protein kinase kinase 4                                  |
| MAP3K1  | IMPACT-341 | 600982 | 4214      | ENSG00000095015 | mitogen-activated protein kinase kinase kinase 1                           |
| MAP3K13 | IMPACT-341 | 604915 | 9175      | ENSG00000073803 | mitogen-activated protein kinase kinase kinase 13                          |
| MAP3K14 | IMPACT-410 | 604655 | 9020      | ENSG00000006062 | mitogen-activated protein kinase kinase kinase 14                          |
| MAPK1   | IMPACT-341 | 176948 | 5594      | ENSG00000100030 | mitogen-activated protein kinase 1                                         |
| MAPK3   | IMPACT-410 | 601795 | 5595      | ENSG00000102882 | mitogen-activated protein kinase 3                                         |
| MAPKAP1 | IMPACT-468 | 610558 | 79109     | ENSG00000119487 | mitogen-activated protein kinase associated protein 1                      |
| MAX     | IMPACT-341 | 154950 | 4149      | ENSG00000125952 | MYC associated factor X                                                    |
| MCL1    | IMPACT-341 | 159552 | 4170      | ENSG00000143384 | myeloid cell leukemia sequence 1 (BCL2-related)                            |
| MDC1    | IMPACT-341 | 607593 | 9656      | ENSG00000137337 | mediator of DNA-damage checkpoint 1                                        |
| MDM2    | IMPACT-341 | 164785 | 4193      | ENSG00000135679 | Mdm2 p53 binding protein homolog (mouse)                                   |
| MDM4    | IMPACT-341 | 602704 | 4194      | ENSG00000198625 | Mdm4 p53 binding protein homolog (mouse)                                   |
| MED12   | IMPACT-341 | 300188 | 9968      | ENSG00000184634 | mediator complex subunit 12                                                |
| MEF2B   | IMPACT-341 | 600661 | 100271849 | ENSG00000213999 | myocyte enhancer factor 2B                                                 |
| MEN1    | IMPACT-341 | 613733 | 4221      | ENSG00000133895 | multiple endocrine neoplasia I                                             |
| MET     | IMPACT-341 | 164860 | 4233      | ENSG00000105976 | met proto-oncogene (hepatocyte growth factor receptor)                     |
| MGA     | IMPACT-410 | 616061 | 23269     | ENSG00000174197 | MAX gene associated                                                        |
| MITF    | IMPACT-341 | 156845 | 4286      | ENSG00000187098 | microphthalmia-associated transcription factor                             |
| MLH1    | IMPACT-341 | 120436 | 4292      | ENSG00000076242 | mutL homolog 1, colon cancer, nonpolyposis type 2 (E. coli)                |
| MLL     | IMPACT-341 | 159555 | 4297      | ENSG00000118058 | myeloid/lymphoid or mixed-lineage leukemia (trithorax homolog, Drosophila) |
| MLL2    | IMPACT-341 | 602113 | 8085      | ENSG00000167548 | myeloid/lymphoid or mixed-lineage leukemia 2                               |

|        |            |        |        |                 |                                                                                     |
|--------|------------|--------|--------|-----------------|-------------------------------------------------------------------------------------|
| MLL3   | IMPACT-341 | 606833 | 58508  | ENSG00000055609 | myeloid/lymphoid or mixed-lineage leukemia 3                                        |
| MPL    | IMPACT-341 | 159530 | 4352   | ENSG00000117400 | myeloproliferative leukemia virus oncogene                                          |
| MRE11A | IMPACT-341 | 600814 | 4361   | ENSG00000020922 | MRE11 meiotic recombination 11 homolog A ( <i>S. cerevisiae</i> )                   |
| MSH2   | IMPACT-341 | 609309 | 4436   | ENSG00000095002 | mutS homolog 2, colon cancer, nonpolyposis type 1 ( <i>E. coli</i> )                |
| MSH3   | IMPACT-468 | 600887 | 4437   | ENSG00000113318 | mutS homolog 3 ( <i>E. coli</i> )                                                   |
| MSH6   | IMPACT-341 | 600678 | 2956   | ENSG00000116062 | mutS homolog 6 ( <i>E. coli</i> )                                                   |
| MSI1   | IMPACT-468 | 603328 | 4440   | ENSG00000135097 | musashi homolog 1 ( <i>Drosophila</i> )                                             |
| MSI2   | IMPACT-468 | 607897 | 124540 | ENSG00000153944 | musashi homolog 2 ( <i>Drosophila</i> )                                             |
| MST1   | IMPACT-410 | 142408 | 4485   | ENSG00000173531 | macrophage stimulating 1 (hepatocyte growth factor-like)                            |
| MST1R  | IMPACT-410 | 600168 | 4486   | ENSG00000164078 | macrophage stimulating 1 receptor (c-met-related tyrosine kinase)                   |
| MTOR   | IMPACT-341 | 601231 | 2475   | ENSG00000198793 | mechanistic target of rapamycin (serine/threonine kinase)                           |
| MUTYH  | IMPACT-341 | 604933 | 4595   | ENSG00000132781 | mutY homolog ( <i>E. coli</i> )                                                     |
| MYC    | IMPACT-341 | 190080 | 4609   | ENSG00000136997 | v-myc myelocytomatosis viral oncogene homolog (avian)                               |
| MYCL1  | IMPACT-341 | 164850 | 4610   | ENSG00000116990 | v-myc myelocytomatosis viral oncogene homolog 1, lung carcinoma derived (avian)     |
| MYCN   | IMPACT-341 | 164840 | 4613   | ENSG00000134323 | v-myc myelocytomatosis viral related oncogene, neuroblastoma derived (avian)        |
| MYD88  | IMPACT-341 | 602170 | 4615   | ENSG00000172936 | myeloid differentiation primary response gene (88)                                  |
| MYOD1  | IMPACT-341 | 159970 | 4654   | ENSG00000129152 | myogenic differentiation 1                                                          |
| NBN    | IMPACT-341 | 602667 | 4683   | ENSG00000104320 | nibrin                                                                              |
| NCOA3  | IMPACT-410 | 601937 | 8202   | ENSG00000124151 | nuclear receptor coactivator 3                                                      |
| NCOR1  | IMPACT-341 | 600849 | 9611   | ENSG00000141027 | nuclear receptor corepressor 1                                                      |
| NEGR1  | IMPACT-410 | 613173 | 257194 | ENSG00000172260 | neuronal growth regulator 1                                                         |
| NF1    | IMPACT-341 | 613113 | 4763   | ENSG00000196712 | neurofibromin 1                                                                     |
| NF2    | IMPACT-341 | 607379 | 4771   | ENSG00000186575 | neurofibromin 2 (merlin)                                                            |
| NFE2L2 | IMPACT-341 | 600492 | 4780   | ENSG00000116044 | nuclear factor (erythroid-derived 2)-like 2                                         |
| NFKBIA | IMPACT-410 | 164008 | 4792   | ENSG00000100906 | nuclear factor of kappa light polypeptide gene enhancer in B-cells inhibitor, alpha |
| NKX2-1 | IMPACT-341 | 600635 | 7080   | ENSG00000136352 | NK2 homeobox 1                                                                      |
| NKX3-1 | IMPACT-341 | 602041 | 4824   | ENSG00000167034 | NK3 homeobox 1                                                                      |
| NOTCH1 | IMPACT-341 | 190198 | 4851   | ENSG00000148400 | notch 1                                                                             |
| NOTCH2 | IMPACT-341 | 600275 | 4853   | ENSG00000134250 | notch 2                                                                             |
| NOTCH3 | IMPACT-341 | 600276 | 4854   | ENSG00000074181 | notch 3                                                                             |
| NOTCH4 | IMPACT-341 | 164951 | 4855   | ENSG00000204301 | notch 4                                                                             |
| NPM1   | IMPACT-341 | 164040 | 4869   | ENSG00000181163 | nucleophosmin (nucleolar phosphoprotein B23, numatrin)                              |
| NRAS   | IMPACT-341 | 164790 | 4893   | ENSG00000213281 | neuroblastoma RAS viral (v-ras) oncogene homolog                                    |
| NSD1   | IMPACT-341 | 606681 | 64324  | ENSG00000165671 | nuclear receptor binding SET domain protein 1                                       |

|          |            |        |       |                 |                                                                    |
|----------|------------|--------|-------|-----------------|--------------------------------------------------------------------|
| NTHL1    | IMPACT-468 | 602656 | 4913  | ENSG00000065057 | nth endonuclease III-like 1 (E. coli)                              |
| NTRK1    | IMPACT-341 | 191315 | 4914  | ENSG00000198400 | neurotrophic tyrosine kinase, receptor, type 1                     |
| NTRK2    | IMPACT-341 | 600456 | 4915  | ENSG00000148053 | neurotrophic tyrosine kinase, receptor, type 2                     |
| NTRK3    | IMPACT-341 | 191316 | 4916  | ENSG00000140538 | neurotrophic tyrosine kinase, receptor, type 3                     |
| NUF2     | IMPACT-468 | 611772 | 83540 | ENSG00000143228 | NUF2, NDC80 kinetochore complex component, homolog (S. cerevisiae) |
| NUP93    | IMPACT-410 | 614351 | 9688  | ENSG00000102900 | nucleoporin 93kDa                                                  |
| PAK1     | IMPACT-341 | 602590 | 5058  | ENSG00000149269 | p21 protein (Cdc42/Rac)-activated kinase 1                         |
| PAK7     | IMPACT-341 | 608038 | 57144 | ENSG00000101349 | p21 protein (Cdc42/Rac)-activated kinase 7                         |
| PALB2    | IMPACT-341 | 610355 | 79728 | ENSG00000083093 | partner and localizer of BRCA2                                     |
| PARK2    | IMPACT-341 | 602544 | 5071  | ENSG00000185345 | parkinson protein 2, E3 ubiquitin protein ligase (parkin)          |
| PARP1    | IMPACT-341 | 173870 | 142   | ENSG00000143799 | poly (ADP-ribose) polymerase 1                                     |
| PAX5     | IMPACT-341 | 167414 | 5079  | ENSG00000196092 | paired box 5                                                       |
| PBRM1    | IMPACT-341 | 606083 | 55193 | ENSG00000163939 | polybromo 1                                                        |
| PDCD1    | IMPACT-341 | 600244 | 5133  | ENSG00000188389 | programmed cell death 1                                            |
| PDCD1LG2 | IMPACT-468 | 605723 | 80380 | ENSG00000197646 | programmed cell death 1 ligand 2                                   |
| PDGFRA   | IMPACT-341 | 173490 | 5156  | ENSG00000134853 | platelet-derived growth factor receptor, alpha polypeptide         |
| PDGFRB   | IMPACT-341 | 173410 | 5159  | ENSG00000113721 | platelet-derived growth factor receptor, beta polypeptide          |
| PDPK1    | IMPACT-341 | 605213 | 5170  | ENSG00000140992 | 3-phosphoinositide dependent protein kinase-1                      |
| PGR      | IMPACT-410 | 607311 | 5241  | ENSG00000082175 | progesterone receptor                                              |
| PHOX2B   | IMPACT-341 | 603851 | 8929  | ENSG00000109132 | paired-like homeobox 2b                                            |
| PIK3C2G  | IMPACT-341 | 609001 | 5288  | ENSG00000139144 | phosphoinositide-3-kinase, class 2, gamma polypeptide              |
| PIK3C3   | IMPACT-341 | 602609 | 5289  | ENSG00000078142 | phosphoinositide-3-kinase, class 3                                 |
| PIK3CA   | IMPACT-341 | 171834 | 5290  | ENSG00000121879 | phosphoinositide-3-kinase, catalytic, alpha polypeptide            |
| PIK3CB   | IMPACT-341 | 602925 | 5291  | ENSG00000051382 | phosphoinositide-3-kinase, catalytic, beta polypeptide             |
| PIK3CD   | IMPACT-341 | 602839 | 5293  | ENSG00000171608 | phosphoinositide-3-kinase, catalytic, delta polypeptide            |
| PIK3CG   | IMPACT-341 | 601232 | 5294  | ENSG00000105851 | phosphoinositide-3-kinase, catalytic, gamma polypeptide            |
| PIK3R1   | IMPACT-341 | 171833 | 5295  | ENSG00000145675 | phosphoinositide-3-kinase, regulatory subunit 1 (alpha)            |
| PIK3R2   | IMPACT-341 | 603157 | 5296  | ENSG00000105647 | phosphoinositide-3-kinase, regulatory subunit 2 (beta)             |
| PIK3R3   | IMPACT-341 | 606076 | 8503  | ENSG00000117461 | phosphoinositide-3-kinase, regulatory subunit 3 (gamma)            |
| PIM1     | IMPACT-341 | 164960 | 5292  | ENSG00000137193 | pim-1 oncogene                                                     |
| PLCG2    | IMPACT-410 | 600220 | 5336  | ENSG00000197943 | phospholipase C, gamma 2 (phosphatidylinositol-specific)           |
| PLK2     | IMPACT-341 | 607023 | 10769 | ENSG00000145632 | polo-like kinase 2                                                 |

|         |            |        |        |                 |                                                                                            |
|---------|------------|--------|--------|-----------------|--------------------------------------------------------------------------------------------|
| PMAIP1  | IMPACT-341 | 604959 | 5366   | ENSG00000141682 | phorbol-12-myristate-13-acetate-induced protein 1                                          |
| PMS1    | IMPACT-341 | 600258 | 5378   | ENSG00000064933 | PMS1 postmeiotic segregation increased 1 ( <i>S. cerevisiae</i> )                          |
| PMS2    | IMPACT-341 | 600259 | 5395   | ENSG00000122512 | PMS2 postmeiotic segregation increased 2 ( <i>S. cerevisiae</i> )                          |
| PNRC1   | IMPACT-341 | 606714 | 10957  | ENSG00000146278 | proline-rich nuclear receptor coactivator 1                                                |
| POLD1   | IMPACT-410 | 174761 | 5424   | ENSG00000062822 | polymerase (DNA directed), delta 1, catalytic subunit 125kDa                               |
| POLE    | IMPACT-341 | 174762 | 5426   | ENSG00000177084 | polymerase (DNA directed), epsilon                                                         |
| PPARG   | IMPACT-468 | 601487 | 5468   | ENSG00000132170 | peroxisome proliferator-activated receptor gamma                                           |
| PPM1D   | IMPACT-410 | 605100 | 8493   | ENSG00000170836 | protein phosphatase, Mg <sup>2+</sup> /Mn <sup>2+</sup> dependent, 1D                      |
| PPP2R1A | IMPACT-341 | 605983 | 5518   | ENSG00000105568 | protein phosphatase 2, regulatory subunit A, alpha                                         |
| PPP4R2  | IMPACT-468 | 613822 | 151987 | ENSG00000163605 | protein phosphatase 4, regulatory subunit 2                                                |
| PPP6C   | IMPACT-410 | 612725 | 5537   | ENSG00000119414 | protein phosphatase 6, catalytic subunit                                                   |
| PRDM1   | IMPACT-341 | 603423 | 639    | ENSG00000057657 | PR domain containing 1, with ZNF domain                                                    |
| PRDM14  | IMPACT-468 | 611781 | 63978  | ENSG00000147596 | PR domain containing 14                                                                    |
| PREX2   | IMPACT-468 | 612139 | 80243  | ENSG00000046889 | phosphatidylinositol-3,4,5-trisphosphate-dependent Rac exchange factor 2                   |
| PRKAR1A | IMPACT-341 | 188830 | 5573   | ENSG00000108946 | protein kinase, cAMP-dependent, regulatory, type I, alpha (tissue specific extinguisher 1) |
| PRKCI   | IMPACT-468 | 600539 | 5584   | ENSG00000163558 | protein kinase C, iota                                                                     |
| PRKD1   | IMPACT-468 | 605435 | 5587   | ENSG00000184304 | protein kinase D1                                                                          |
| PTCH1   | IMPACT-341 | 601309 | 5727   | ENSG00000185920 | patched 1                                                                                  |
| PTEN    | IMPACT-341 | 601728 | 5728   | ENSG00000171862 | phosphatase and tensin homolog                                                             |
| PTP4A1  | IMPACT-468 | 601585 | 7803   | ENSG00000112245 | protein tyrosine phosphatase type IVA, member 1                                            |
| PTPN11  | IMPACT-341 | 176876 | 5781   | ENSG00000179295 | protein tyrosine phosphatase, non-receptor type 11                                         |
| PTPRD   | IMPACT-341 | 601598 | 5789   | ENSG00000153707 | protein tyrosine phosphatase, receptor type, D                                             |
| PTPRS   | IMPACT-341 | 601576 | 5802   | ENSG00000105426 | protein tyrosine phosphatase, receptor type, S                                             |
| PTPRT   | IMPACT-341 | 608712 | 11122  | ENSG00000196090 | protein tyrosine phosphatase, receptor type, T                                             |
| RAB35   | IMPACT-410 | 604199 | 11021  | ENSG00000111737 | RAB35, member RAS oncogene family                                                          |
| RAC1    | IMPACT-341 | 602048 | 5879   | ENSG00000136238 | ras-related C3 botulinum toxin substrate 1 (rho family, small GTP binding protein Rac1)    |
| RAC2    | IMPACT-468 | 602049 | 5880   | ENSG00000128340 | ras-related C3 botulinum toxin substrate 2 (rho family, small GTP binding protein Rac2)    |
| RAD21   | IMPACT-410 | 606462 | 5885   | ENSG00000164754 | RAD21 homolog ( <i>S. pombe</i> )                                                          |
| RAD50   | IMPACT-341 | 604040 | 10111  | ENSG00000113522 | RAD50 homolog ( <i>S. cerevisiae</i> )                                                     |

|         |            |        |        |                 |                                                               |
|---------|------------|--------|--------|-----------------|---------------------------------------------------------------|
| RAD51   | IMPACT-341 | 179617 | 5888   | ENSG00000051180 | RAD51 homolog (RecA homolog, E. coli) (S. cerevisiae)         |
| RAD51C  | IMPACT-341 | 602774 | 5889   | ENSG00000108384 | RAD51 homolog C (S. cerevisiae)                               |
| RAD51L1 | IMPACT-341 | 602948 | 5890   | ENSG00000182185 | RAD51-like 1 (S. cerevisiae)                                  |
| RAD51L3 | IMPACT-341 | 602954 | 5892   | ENSG00000185379 | RAD51-like 3 (S. cerevisiae)                                  |
| RAD52   | IMPACT-341 | 600392 | 5893   | ENSG00000002016 | RAD52 homolog (S. cerevisiae)                                 |
| RAD54L  | IMPACT-341 | 603615 | 8438   | ENSG00000085999 | RAD54-like (S. cerevisiae)                                    |
| RAF1    | IMPACT-341 | 164760 | 5894   | ENSG00000132155 | v-raf-1 murine leukemia viral oncogene homolog 1              |
| RARA    | IMPACT-341 | 180240 | 5914   | ENSG00000131759 | retinoic acid receptor, alpha                                 |
| RASA1   | IMPACT-341 | 139150 | 5921   | ENSG00000145715 | RAS p21 protein activator (GTPase activating protein) 1       |
| RB1     | IMPACT-341 | 614041 | 5925   | ENSG00000139687 | retinoblastoma 1                                              |
| RBM10   | IMPACT-341 | 300080 | 8241   | ENSG00000182872 | RNA binding motif protein 10                                  |
| RECQL   | IMPACT-468 | 600537 | 5965   | ENSG00000004700 | RecQ protein-like (DNA helicase Q1-like)                      |
| RECQL4  | IMPACT-341 | 603780 | 9401   | ENSG00000160957 | RecQ protein-like 4                                           |
| REL     | IMPACT-341 | 164910 | 5966   | ENSG00000162924 | v-rel reticuloendotheliosis viral oncogene homolog (avian)    |
| RET     | IMPACT-341 | 164761 | 5979   | ENSG00000165731 | ret proto-oncogene                                            |
| RFWD2   | IMPACT-341 | 608067 | 64326  | ENSG00000143207 | ring finger and WD repeat domain 2                            |
| RHEB    | IMPACT-410 | 601293 | 6009   | ENSG00000106615 | Ras homolog enriched in brain                                 |
| RHOA    | IMPACT-341 | 165390 | 387    | ENSG00000067560 | ras homolog gene family, member A                             |
| RICTOR  | IMPACT-341 | 609022 | 253260 | ENSG00000164327 | RPTOR independent companion of MTOR, complex 2                |
| RIT1    | IMPACT-341 | 609591 | 6016   | ENSG00000143622 | Ras-like without CAAX 1                                       |
| RNF43   | IMPACT-341 | 612482 | 54894  | ENSG00000108375 | ring finger protein 43                                        |
| ROS1    | IMPACT-341 | 165020 | 6098   | ENSG00000047936 | c-ros oncogene 1 , receptor tyrosine kinase                   |
| RPS6KA4 | IMPACT-341 | 603606 | 8986   | ENSG00000162302 | ribosomal protein S6 kinase, 90kDa, polypeptide 4             |
| RPS6KB2 | IMPACT-341 | 608939 | 6199   | ENSG00000175634 | ribosomal protein S6 kinase, 70kDa, polypeptide 2             |
| RPTOR   | IMPACT-341 | 607130 | 57521  | ENSG00000141564 | regulatory associated protein of MTOR, complex 1              |
| RRAGC   | IMPACT-468 | 608267 | 64121  | ENSG00000116954 | Ras-related GTP binding C                                     |
| RRAS    | IMPACT-468 | 165090 | 6237   | ENSG00000126458 | related RAS viral (r-ras) oncogene homolog                    |
| RRAS2   | IMPACT-468 | 600098 | 22800  | ENSG00000133818 | related RAS viral (r-ras) oncogene homolog 2                  |
| RTEL1   | IMPACT-468 | 608833 | 51750  | ENSG00000258366 | regulator of telomere elongation helicase 1                   |
| RUNX1   | IMPACT-341 | 151385 | 861    | ENSG00000159216 | runt-related transcription factor 1                           |
| RXRA    | IMPACT-468 | 180245 | 6256   | ENSG00000186350 | retinoid X receptor, alpha                                    |
| RYBP    | IMPACT-341 | 607535 | 23429  | ENSG00000163602 | RING1 and YY1 binding protein                                 |
| SDHA    | IMPACT-341 | 600857 | 6389   | ENSG00000073578 | succinate dehydrogenase complex, subunit A, flavoprotein (Fp) |
| SDHAF2  | IMPACT-341 | 613019 | 54949  | ENSG00000167985 | succinate dehydrogenase complex assembly factor 2             |

|         |            |        |        |                 |                                                                                                   |
|---------|------------|--------|--------|-----------------|---------------------------------------------------------------------------------------------------|
| SDHB    | IMPACT-341 | 185470 | 6390   | ENSG00000117118 | succinate dehydrogenase complex, subunit B, iron sulfur (lp)                                      |
| SDHC    | IMPACT-341 | 602413 | 6391   | ENSG00000143252 | succinate dehydrogenase complex, subunit C, integral membrane protein, 15kDa                      |
| SDHD    | IMPACT-341 | 602690 | 6392   | ENSG00000204370 | succinate dehydrogenase complex, subunit D, integral membrane protein                             |
| SESN1   | IMPACT-468 | 606103 | 27244  | ENSG00000080546 | sestrin 1                                                                                         |
| SESN2   | IMPACT-468 | 607767 | 83667  | ENSG00000130766 | sestrin 2                                                                                         |
| SESN3   | IMPACT-468 | 607768 | 143686 | ENSG00000149212 | sestrin 3                                                                                         |
| SETD2   | IMPACT-341 | 612778 | 29072  | ENSG00000181555 | SET domain containing 2                                                                           |
| SF3B1   | IMPACT-341 | 605590 | 23451  | ENSG00000115524 | splicing factor 3b, subunit 1, 155kDa                                                             |
| SH2B3   | IMPACT-410 | 605093 | 10019  | ENSG00000111252 | SH2B adaptor protein 3                                                                            |
| SH2D1A  | IMPACT-341 | 300490 | 4068   | ENSG00000183918 | SH2 domain containing 1A                                                                          |
| SHOC2   | IMPACT-468 | 602775 | 8036   | ENSG00000108061 | soc-2 suppressor of clear homolog (C. elegans)                                                    |
| SHQ1    | IMPACT-341 | 613663 | 55164  | ENSG00000144736 | SHQ1 homolog (S. cerevisiae)                                                                      |
| SLX4    | IMPACT-468 | 613278 | 84464  | ENSG00000188827 | SLX4 structure-specific endonuclease subunit homolog (S. cerevisiae)                              |
| SMAD2   | IMPACT-341 | 601366 | 4087   | ENSG00000175387 | SMAD family member 2                                                                              |
| SMAD3   | IMPACT-341 | 603109 | 4088   | ENSG00000166949 | SMAD family member 3                                                                              |
| SMAD4   | IMPACT-341 | 600993 | 4089   | ENSG00000141646 | SMAD family member 4                                                                              |
| SMARCA4 | IMPACT-341 | 603254 | 6597   | ENSG00000127616 | SWI/SNF related, matrix associated, actin dependent regulator of chromatin, subfamily a, member 4 |
| SMARCB1 | IMPACT-341 | 601607 | 6598   | ENSG00000099956 | SWI/SNF related, matrix associated, actin dependent regulator of chromatin, subfamily b, member 1 |
| SMARCD1 | IMPACT-341 | 601735 | 6602   | ENSG00000066117 | SWI/SNF related, matrix associated, actin dependent regulator of chromatin, subfamily d, member 1 |
| SMO     | IMPACT-341 | 601500 | 6608   | ENSG00000128602 | smoothed homolog (Drosophila)                                                                     |
| SMYD3   | IMPACT-468 | 608783 | 64754  | ENSG00000185420 | SET and MYND domain containing 3                                                                  |
| SOCS1   | IMPACT-341 | 603597 | 8651   | ENSG00000185338 | suppressor of cytokine signaling 1                                                                |
| SOS1    | IMPACT-468 | 182530 | 6654   | ENSG00000115904 | son of sevenless homolog 1 (Drosophila)                                                           |
| SOX17   | IMPACT-341 | 610928 | 64321  | ENSG00000164736 | SRY (sex determining region Y)-box 17                                                             |
| SOX2    | IMPACT-341 | 184429 | 6657   | ENSG00000181449 | SRY (sex determining region Y)-box 2                                                              |
| SOX9    | IMPACT-341 | 608160 | 6662   | ENSG00000125398 | SRY (sex determining region Y)-box 9                                                              |
| SPEN    | IMPACT-341 | 613484 | 23013  | ENSG00000065526 | spen homolog, transcriptional regulator (Drosophila)                                              |
| SPOP    | IMPACT-341 | 602650 | 8405   | ENSG00000121067 | speckle-type POZ protein                                                                          |

|          |            |        |        |                 |                                                                                    |
|----------|------------|--------|--------|-----------------|------------------------------------------------------------------------------------|
| SPRED1   | IMPACT-468 | 609291 | 161742 | ENSG00000166068 | sprouty-related, EVH1 domain containing 1                                          |
| SRC      | IMPACT-341 | 190090 | 6714   | ENSG00000197122 | v-src sarcoma (Schmidt-Ruppin A-2) viral oncogene homolog (avian)                  |
| SRSF2    | IMPACT-410 | 600813 | 6427   | ENSG00000161547 | serine/arginine-rich splicing factor 2                                             |
| STAG2    | IMPACT-341 | 300826 | 10735  | ENSG00000101972 | stromal antigen 2                                                                  |
| STAT3    | IMPACT-410 | 102582 | 6774   | ENSG00000168610 | signal transducer and activator of transcription 3 (acute-phase response factor)   |
| STAT5A   | IMPACT-410 | 601511 | 6776   | ENSG00000126561 | signal transducer and activator of transcription 5A                                |
| STAT5B   | IMPACT-410 | 604260 | 6777   | ENSG00000173757 | signal transducer and activator of transcription 5B                                |
| STK11    | IMPACT-341 | 602216 | 6794   | ENSG00000118046 | serine/threonine kinase 11                                                         |
| STK19    | IMPACT-468 | 604977 | 8859   | ENSG00000204344 | serine/threonine kinase 19                                                         |
| STK40    | IMPACT-341 | 609437 | 83931  | ENSG00000196182 | serine/threonine kinase 40                                                         |
| SUFU     | IMPACT-341 | 607035 | 51684  | ENSG00000107882 | suppressor of fused homolog (Drosophila)                                           |
| SUZ12    | IMPACT-341 | 606245 | 23512  | ENSG00000178691 | suppressor of zeste 12 homolog (Drosophila)                                        |
| SYK      | IMPACT-341 | 600085 | 6850   | ENSG00000165025 | spleen tyrosine kinase                                                             |
| TAP1     | IMPACT-468 | 170260 | 6890   | ENSG00000168394 | transporter 1, ATP-binding cassette, sub-family B (MDR/TAP)                        |
| TAP2     | IMPACT-468 | 170261 | 6891   | ENSG00000204267 | transporter 2, ATP-binding cassette, sub-family B (MDR/TAP)                        |
| TBX3     | IMPACT-341 | 601621 | 6926   | ENSG00000135111 | T-box 3                                                                            |
| TCEB1    | IMPACT-410 | 600788 | 6921   | ENSG00000154582 | transcription elongation factor B (SIII), polypeptide 1 (15kDa, elongin C)         |
| TCF3     | IMPACT-410 | 147141 | 6929   | ENSG00000071564 | transcription factor 3 (E2A immunoglobulin enhancer binding factors E12/E47)       |
| TCF7L2   | IMPACT-410 | 602228 | 6934   | ENSG00000148737 | transcription factor 7-like 2 (T-cell specific, HMG-box)                           |
| TEK      | IMPACT-468 | 600221 | 7010   | ENSG00000120156 | TEK tyrosine kinase, endothelial                                                   |
| TERT     | IMPACT-341 | 187270 | 7015   | ENSG00000164362 | telomerase reverse transcriptase                                                   |
| TET1     | IMPACT-341 | 607790 | 80312  | ENSG00000138336 | tet oncogene 1                                                                     |
| TET2     | IMPACT-341 | 612839 | 54790  | ENSG00000168769 | tet oncogene family member 2                                                       |
| TGFBR1   | IMPACT-341 | 190181 | 7046   | ENSG00000106799 | transforming growth factor, beta receptor 1                                        |
| TGFBR2   | IMPACT-341 | 190182 | 7048   | ENSG00000163513 | transforming growth factor, beta receptor II (70/80kDa)                            |
| TMEM127  | IMPACT-341 | 613403 | 55654  | ENSG00000135956 | transmembrane protein 127                                                          |
| TMPRSS2  | IMPACT-341 | 602060 | 7113   | ENSG00000184012 | transmembrane protease, serine 2                                                   |
| TNFAIP3  | IMPACT-341 | 191163 | 7128   | ENSG00000118503 | tumor necrosis factor, alpha-induced protein 3                                     |
| TNFRSF14 | IMPACT-341 | 602746 | 8764   | ENSG00000157873 | tumor necrosis factor receptor superfamily, member 14 (herpesvirus entry mediator) |
| TOP1     | IMPACT-341 | 126420 | 7150   | ENSG00000198900 | topoisomerase (DNA) I                                                              |



|         |            |        |       |                 |                                                                        |
|---------|------------|--------|-------|-----------------|------------------------------------------------------------------------|
| TP53    | IMPACT-341 | 191170 | 7157  | ENSG00000141510 | tumor protein p53                                                      |
| TP53BP1 | IMPACT-468 | 605230 | 7158  | ENSG00000067369 | tumor protein p53 binding protein 1                                    |
| TP63    | IMPACT-341 | 603273 | 8626  | ENSG00000073282 | tumor protein p63                                                      |
| TRAF2   | IMPACT-410 | 601895 | 7186  | ENSG00000127191 | TNF receptor-associated factor 2                                       |
| TRAF7   | IMPACT-341 | 606692 | 84231 | ENSG00000131653 | TNF receptor-associated factor 7                                       |
| TSC1    | IMPACT-341 | 605284 | 7248  | ENSG00000165699 | tuberous sclerosis 1                                                   |
| TSC2    | IMPACT-341 | 191092 | 7249  | ENSG00000103197 | tuberous sclerosis 2                                                   |
| TSHR    | IMPACT-341 | 603372 | 7253  | ENSG00000165409 | thyroid stimulating hormone receptor                                   |
| U2AF1   | IMPACT-341 | 191317 | 7307  | ENSG00000160201 | U2 small nuclear RNA auxiliary factor 1                                |
| UPF1    | IMPACT-468 | 601430 | 5976  | ENSG00000005007 | UPF1 regulator of nonsense transcripts homolog (yeast)                 |
| VEGFA   | IMPACT-410 | 192240 | 7422  | ENSG00000112715 | vascular endothelial growth factor A                                   |
| VHL     | IMPACT-341 | 608537 | 7428  | ENSG00000134086 | von Hippel-Lindau tumor suppressor                                     |
| VTCN1   | IMPACT-341 | 608162 | 79679 | ENSG00000134258 | V-set domain containing T cell activation inhibitor 1                  |
| WHSC1   | IMPACT-468 | 602952 | 7468  | ENSG00000109685 | Wolf-Hirschhorn syndrome candidate 1                                   |
| WHSC1L1 | IMPACT-468 | 607083 | 54904 | ENSG00000147548 | Wolf-Hirschhorn syndrome candidate 1-like 1                            |
| WT1     | IMPACT-341 | 607102 | 7490  | ENSG00000184937 | Wilms tumor 1                                                          |
| WWTR1   | IMPACT-468 | 607392 | 25937 | ENSG00000018408 | WW domain containing transcription regulator 1                         |
| XIAP    | IMPACT-341 | 300079 | 331   | ENSG00000101966 | X-linked inhibitor of apoptosis                                        |
| XPO1    | IMPACT-341 | 602559 | 7514  | ENSG00000082898 | exportin 1 (CRM1 homolog, yeast)                                       |
| XRCC2   | IMPACT-410 | 600375 | 7516  | ENSG00000196584 | X-ray repair complementing defective repair in Chinese hamster cells 2 |
| YAP1    | IMPACT-341 | 606608 | 10413 | ENSG00000137693 | Yes-associated protein 1                                               |
| YES1    | IMPACT-341 | 164880 | 7525  | ENSG00000176105 | v-yes-1 Yamaguchi sarcoma viral oncogene homolog 1                     |
| ZFHX3   | IMPACT-410 | 104155 | 463   | ENSG00000140836 | zinc finger homeobox 3                                                 |
| ZRSR2   | IMPACT-410 | 300028 | 8233  | ENSG00000169249 | zinc finger (CCCH type), RNA-binding motif and serine/arginine rich 2  |

**eTable 3. Univariable and Multivariable Cox Proportional Hazards Models for Relapse-Free Survival, Using Clinicopathologic Variables\***

| Variable                                     | Univariable       |        | Multivariable    |        |
|----------------------------------------------|-------------------|--------|------------------|--------|
|                                              | HR (95% CI)       | P      | HR (95% CI)      | P      |
| Age at surgery                               | 1.01 (0.99-1.04)  | 0.2    | -                | -      |
| Sex (vs female)                              | 1.00 (-)          | -      | -                | -      |
| Male                                         | 1.31 (0.86-2.01)  | 0.2    | -                | -      |
| Ever smoker (vs never)                       | 1.04 (0.64-1.69)  | 0.9    | -                | -      |
| Primary tumor SUVmax                         | 1.06 (1.02-1.10)  | 0.003  | -                | -      |
| Operative approach (vs minimally invasive)   | 1.00 (-)          | -      | 1.00 (-)         | -      |
| Open (thoracotomy)                           | 2.08 (1.31-3.31)  | 0.003  | 1.83 (1.14-2.94) | 0.012  |
| Resection (vs lobectomy/pneumonectomy)       | 1.00 (-)          | -      | 1.00 (-)         | -      |
| Sublobar (wedge/segment)                     | 1.86 (1.10-3.15)  | 0.02   | 1.96 (1.16-3.31) | 0.013  |
| Lymphovascular invasion present              | 2.61 (1.61-4.23)  | <0.001 | 2.44 (1.48-4.05) | 0.001  |
| Spread of tumor through air spaces present   | 1.61 (0.76-3.40)  | 0.2    | -                | -      |
| Visceral pleural invasion present            | 1.75 (1.08-2.82)  | 0.02   | -                | -      |
| Adjuvant therapy                             | 0.84 (0.44-1.64)  | 0.6    | -                | -      |
| Predominant histologic subtype (vs nonsolid) | 1.00 (-)          | -      | -                | -      |
| Solid                                        | 1.96 (1.19-3.20)  | 0.008  | 1.74 (1.05-2.89) | 0.031  |
| Pathologic stage (vs I)                      | 1.00 (-)          | -      | 1.00 (-)         | -      |
| II                                           | 3.28 (1.94-5.54)  | <0.001 | 2.39 (1.28-4.45) | 0.006  |
| III                                          | 7.21 (4.46-11.68) | <0.001 | 3.64 (1.92-6.90) | <0.001 |

CI, confidence interval; HR, hazard ratio; SUVmax, maximum standardized uptake value.

\*Univariable models were stratified by pathologic stage (except for stage variable).

**eTable 4. Univariable and Clinicopathologic (CP)-Adjusted Multivariable Cox Model for Relapse-Free Survival**

| Genomic Factor/Gene | Median (IQR) or n (%) | Univariable      |        |       | CP-Adjusted Multivariable |       |
|---------------------|-----------------------|------------------|--------|-------|---------------------------|-------|
|                     |                       | HR (95% CI)      | P      | FDR-P | HR (95% CI)               | P     |
| TMB                 | 4.7 (2.5-8.2)         | 1.02 (1.01-1.03) | <0.001 | NA    | 1.01 (1.00-1.03)          | 0.074 |
| FGA (x100)          | 3.8 (0.4-11.1)        | 1.04 (1.02-1.05) | <0.001 | NA    | 1.03 (1.01-1.04)          | 0.005 |
| WGD                 | 92 (22%)              | 1.59 (1.02-2.50) | 0.05   | NA    | -                         | -     |
| ALK                 | 5 (1.2%)              | NA               | NA     | NA    | -                         | -     |
| APC                 | 5 (1.2%)              | NA               | NA     | NA    | -                         | -     |
| ARID1A              | 7 (1.6%)              | 0.79 (0.11-5.67) | 0.8    | 0.9   | -                         | -     |
| ARID2               | 14 (3.3%)             | 0.32 (0.04-2.32) | 0.3    | 0.5   | -                         | -     |
| ATM                 | 10 (2.3%)             | 2.00 (0.73-5.46) | 0.2    | 0.4   | -                         | -     |
| B2M                 | 3 (0.7%)              | NA               | NA     | NA    | -                         | -     |
| BAP1                | 4 (0.9%)              | NA               | NA     | NA    | -                         | -     |
| BCOR                | 3 (0.7%)              | NA               | NA     | NA    | -                         | -     |
| BRAF                | 20 (4.7%)             | 0.47 (0.11-1.89) | 0.3    | 0.5   | -                         | -     |
| BRCA2               | 4 (0.9%)              | NA               | NA     | NA    | -                         | -     |
| CDK4                | 25 (5.9%)             | 0.81 (0.30-2.21) | 0.7    | 0.9   | -                         | -     |
| CDKN2A              | 24 (5.6%)             | 1.96 (0.98-3.91) | 0.06   | 0.3   | -                         | -     |
| CDKN2B              | 8 (1.9%)              | 2.26 (0.71-7.17) | 0.2    | 0.4   | -                         | -     |
| CTNNB1              | 5 (1.2%)              | NA               | NA     | NA    | -                         | -     |
| EGFR                | 117 (27%)             | 0.90 (0.57-1.43) | 0.7    | 0.9   | -                         | -     |
| ERBB2               | 20 (4.7%)             | 2.94 (1.47-5.88) | 0.002  | 0.03  | 1.99 (0.96-4.16)          | 0.066 |
| FAT1                | 10 (2.3%)             | 1.54 (0.49-4.88) | 0.5    | 0.8   | -                         | -     |
| FOXA1               | 3 (0.7%)              | NA               | NA     | NA    | -                         | -     |
| GLI1                | 7 (1.6%)              | 0.68 (0.09-4.88) | 0.7    | 0.9   | -                         | -     |
| GNAS                | 6 (1.4%)              | NA               | NA     | NA    | -                         | -     |
| KEAP1               | 17 (4.0%)             | 1.20 (0.44-3.27) | 0.7    | 0.9   | -                         | -     |
| KIT                 | 3 (0.7%)              | NA               | NA     | NA    | -                         | -     |
| KRAS                | 169 (40%)             | 0.85 (0.55-1.30) | 0.4    | 0.7   | -                         | -     |
| MDM2                | 30 (7.0%)             | 1.55 (0.75-3.21) | 0.2    | 0.4   | -                         | -     |
| MED12               | 4 (0.9%)              | NA               | NA     | NA    | -                         | -     |
| MET                 | 11 (2.6%)             | 1.41 (0.45-4.46) | 0.6    | 0.9   | -                         | -     |
| MGA                 | 13 (3.1%)             | 1.44 (0.53-3.93) | 0.5    | 0.8   | -                         | -     |
| MYC                 | 12 (2.8%)             | 1.86 (0.68-5.08) | 0.2    | 0.4   | -                         | -     |
| NF1                 | 20 (4.7%)             | 1.83 (0.80-4.19) | 0.2    | 0.4   | -                         | -     |
| NF2                 | 3 (0.7%)              | NA               | NA     | NA    | -                         | -     |

|                |           |                   |        |       |                  |       |
|----------------|-----------|-------------------|--------|-------|------------------|-------|
| <i>NKX2-1</i>  | 9 (2.1%)  | 2.70 (0.99-7.37)  | 0.05   | 0.3   | -                | -     |
| <i>NTRK1</i>   | 4 (0.9%)  | NA                | NA     | NA    | -                | -     |
| <i>PIK3CA</i>  | 17 (4.0%) | 0.96 (0.30-3.04)  | 0.9    | 0.9   | -                | -     |
| <i>PIK3R1</i>  | 5 (1.2%)  | NA                | NA     | NA    | -                | -     |
| <i>PTPRD</i>   | 5 (1.2%)  | NA                | NA     | NA    | -                | -     |
| <i>PTPRT</i>   | 10 (2.3%) | 2.26 (0.83-6.18)  | 0.1    | 0.4   | -                | -     |
| <i>RB1</i>     | 12 (2.8%) | 2.00 (0.80-4.97)  | 0.1    | 0.4   | -                | -     |
| <i>RBM10</i>   | 52 (12%)  | 0.35 (0.13-0.94)  | 0.04   | 0.2   | -                | -     |
| <i>RET</i>     | 8 (1.9%)  | **                | **     | **    | -                | -     |
| <i>ROS1</i>    | 4 (0.9%)  | NA                | NA     | NA    | -                | -     |
| <i>SETD2</i>   | 12 (2.8%) | 0.80 (0.20-3.26)  | 0.8    | 0.9   | -                | -     |
| <i>SMAD4</i>   | 8 (1.9%)  | 3.74 (1.37-10.24) | 0.01   | 0.08  | -                | -     |
| <i>SMARCA4</i> | 12 (2.8%) | 3.57 (1.55-8.19)  | 0.003  | 0.03  | 2.44 (1.03-5.77) | 0.042 |
| <i>STK11</i>   | 71 (17%)  | 0.95 (0.54-1.65)  | 0.8    | 0.9   | -                | -     |
| <i>TERT</i>    | 25 (5.9%) | 1.10 (0.47-2.56)  | 0.8    | 0.9   | -                | -     |
| <i>TP53</i>    | 138 (32%) | 2.32 (1.53-3.51)  | <0.001 | 0.003 | 1.73 (1.09-2.73) | 0.019 |
| <i>U2AF1</i>   | 9 (2.1%)  | 0.38 (0.05-2.76)  | 0.3    | 0.5   | -                | -     |

TMB, normalized tumor mutation burden; FGA, fraction of genome altered; WGD, whole genome doubling; CI, confidence interval; HR, hazard ratio; FDR-P, False discovery rate corrected *P*-value; NA, not applicable; variable was not analyzed due to low incidence of alterations among patients with the event of interest.

\*All genes with alteration frequency >1% in the MSK-IMPACT Panel are listed; however, to ensure convergence, only genes with more than 5 cases were assessed.

\*\*Model did not converge.

**eTable 5. Types of Alteration and Recurrence Rates for Patients With Alterations in Genes Associated With Relapse-Free Survival**

| Gene           | Total Patients with Alteration No. (%) | Total Number of Alterations in Cohort (No. Mutations/CNA-type)                           | Total Recurrences No. (%) |
|----------------|----------------------------------------|------------------------------------------------------------------------------------------|---------------------------|
| <i>SMARCA4</i> | 12/426 (2.8%)                          | 16 Alterations<br>(15 Mutations-11 Truncating*, 4 Missense)<br>(1 Fusion)<br>(0 CNA)     | 6/12 (50%)                |
| <i>TP53</i>    | 138/426 (32%)                          | 157 Alterations<br>(155 Mutations-59 Truncating*, 92 Missense)<br>(2 Fusions)<br>(0 CNA) | 36/138 (26%)              |

Truncating mutations are composed of nonsense, frameshift, and splice-site mutations. CNA, copy number alteration.

**eTable 6. Number of Level 1 Actionable Alterations**

| Gene        | Total Patients with Alteration, No.<br>(% of Total Cohort) | Total Actionable Alterations,<br>No. (% of Total Altered) |
|-------------|------------------------------------------------------------|-----------------------------------------------------------|
| <i>EGFR</i> | 117/426 (27%)                                              | 106/117 (91%)                                             |
| <i>BRAF</i> | 20/426 (4.7%)                                              | 3/20 (15%)                                                |
| <i>ALK</i>  | 5/426 (1.2%)                                               | 5/5 (100%)                                                |
| <i>ROS1</i> | 4/426 (0.93%)                                              | 4/4 (100%)                                                |

**eTable 7. Comparison of Proportion of Patients With Pathologic Stage I Cancer Who Recurred by TNM Risk Group**

| TNM Risk Group                                       | N (%) of Total Stage I Patients | N (%) of Stage I Patients who Recurred |
|------------------------------------------------------|---------------------------------|----------------------------------------|
| Low-risk (T1a-b and 0-1 aggressive factors*)         | 189/318 (59%)                   | 10/28 (36%)                            |
| Intermediate-risk (T1a-b and 2-3 aggressive factors) | 70/318 (22%)                    | 8/28 (29%)                             |
| High-risk (T1c/T2a and any aggressive factors)       | 59/318 (19%)                    | 10/28 (36%)                            |

\*As defined by NCCN guidelines<sup>1</sup>: lymphovascular invasion, visceral pleural invasion, and sublobar resection

1. National Comprehensive Cancer Network. Non-Small Cell Lung Cancer (Version 4.2020). Accessed May 28, 2020.

**eTable 8. Predicted Relapse-Free Survival at 1, 2, and 3 Years by PRecur Risk Group for the MSK and TCGA Data Sets**

| MSK Risk Group  | Predicted Relapse-Free Survival, 95%CI |                  |                  |
|-----------------|----------------------------------------|------------------|------------------|
|                 | <i>1-Year</i>                          | <i>2-Year</i>    | <i>3-Year</i>    |
| Low             | 0.98 (0.96-0.99)                       | 0.96 (0.93-0.99) | 0.93 (0.89-0.98) |
| Intermediate    | 0.90 (0.86-0.94)                       | 0.81 (0.75-0.88) | 0.72 (0.64-0.81) |
| High            | 0.70 (0.61-0.81)                       | 0.49 (0.39-0.63) | 0.33 (0.22-0.50) |
| TCGA Risk Group | <i>1-Year</i>                          | <i>2-Year</i>    | <i>3-Year</i>    |
| Low             | 0.90 (0.85-0.96)                       | 0.74 (0.62-0.89) | 0.62 (0.46-0.82) |
| Intermediate    | 0.88 (0.83-0.93)                       | 0.70 (0.64-0.77) | 0.57 (0.49-0.66) |
| High            | 0.83 (0.78-0.89)                       | 0.58 (0.50-0.68) | 0.42 (0.33-0.53) |



## eReferences.

1. Cheng DT, Mitchell TN, Zehir A, et al. Memorial Sloan Kettering-Integrated Mutation Profiling of Actionable Cancer Targets (MSK-IMPACT): a hybridization capture-based next-generation sequencing clinical assay for solid tumor molecular oncology. *J Mol Diagn.* 2015;17(3):251-264.
2. Zehir A, Benayed R, Shah RH, et al. Mutational landscape of metastatic cancer revealed from prospective clinical sequencing of 10,000 patients. *Nat Med.* 2017;23(6):703-713.
3. Sanchez-Vega F, Mina M, Armenia J, et al. Oncogenic signaling pathways in The Cancer Genome Atlas. *Cell.* 2018;173(2):321-337 e310.
4. Jordan EJ, Kim HR, Arcila ME, et al. Prospective comprehensive molecular characterization of lung adenocarcinomas for efficient patient matching to approved and emerging therapies. *Cancer Discov.* 2017;7(6):596-609.
5. Schemper M, Smith TL. A note on quantifying follow-up in studies of failure time. *Control Clin Trials.* 1996;17(4):343-346.
6. Van Buuren S, Groothuis-Oudshoorn K. MICE: Multivariate Imputation by Chained Equations in R. *J Stat Soft.* 2011;45.
7. Moons KG, Donders RA, Stijnen T, Harrell FE, Jr. Using the outcome for imputation of missing predictor values was preferred. *J Clin Epidemiol.* 2006;59(10):1092-1101.
8. Rubin DB. *Multiple Imputation for Nonresponse in Surveys.* New York: John Wiley and Sons; 1987.
9. Shen R, Martin A, Ni A, et al. Harnessing clinical sequencing data for survival stratification of patients with metastatic lung adenocarcinomas. *JCO Precis Oncol.* 2019;3.
10. Lausen B, Schumacher M. Maximally Selected Rank Statistics. *Biometrics.* 1992;48(1):73-85.
11. Steyerberg EW, Vickers AJ, Cook NR, et al. Assessing the Performance of Prediction Models A Framework for Traditional and Novel Measures. *Epidemiology.* 2010;21(1):128-138.
12. Heller G, Mo QX. Estimating the concordance probability in a survival analysis with a discrete number of risk groups. *Lifetime Data Anal.* 2016;22(2):263-279.
13. Harrell FE, Jr., Califf RM, Pryor DB, Lee KL, Rosati RA. Evaluating the yield of medical tests. *JAMA.* 1982;247(18):2543-2546.
14. Gonen M, Heller G. Concordance probability and discriminatory power in proportional hazards regression. *Biometrika.* 2005;92(4):965-970.
15. Beer DG, Kardia SL, Huang CC, et al. Gene-expression profiles predict survival of patients with lung adenocarcinoma. *Nat Med.* 2002;8(8):816-824.
16. Blackstone EH. The Hazard Package (Cleveland Clinic Foundation). <https://www.lerner.ccf.org/qhs/software/hazard/>. Accessed Jan 3, 2020.
17. Imielinski M, Berger AH, Hammerman PS, et al. Mapping the hallmarks of lung adenocarcinoma with massively parallel sequencing. *Cell.* 2012;150(6):1107-1120.
18. Jamal-Hanjani M, Wilson GA, McGranahan N, et al. Tracking the Evolution of Non-Small-Cell Lung Cancer. *N Engl J Med.* 2017;376(22):2109-2121.
